1

2

3

4

5

6

7

8 **Mutational inactivation of Apc in the intestinal epithelia compromises cellular**  
9 **organisation**

10 Helena Rannikmae <sup>1</sup>, Samantha Peel <sup>2</sup>, Simon Barry <sup>3</sup>, Inderpreet Sur <sup>4</sup>, Jussi Taipale <sup>1,4</sup>, Takao  
11 Senda <sup>5</sup>, Marc de la Roche <sup>1,6</sup>

12

13 1. Department of Biochemistry, University of Cambridge, Cambridge, UK

14 2. Discovery Science, BioPharmaceuticals R&D, AstraZeneca, Cambridge, UK

15 3. Bioscience, Oncology R&D, AstraZeneca, Cambridge, UK

16 4. Department of Medical Biochemistry and Biophysics, Karolinska Institute, Sweden

17 5. Department of Anatomy, Graduate School of Medicine, Gifu University, Gifu, Japan

18 6. Correspondence: [mad58@cam.ac.uk](mailto:mad58@cam.ac.uk)

19

20

21 **Running title:** Epithelial APC function

22

23 **Keywords:** intestinal epithelia, organoids, microtubule cytoskeleton, adenomatous polyposis

24 coli (APC), Wnt pathway.

25 **Summary statement**

26 We have determined that APC control of intestinal epithelia form and function can be divided  
27 by three independent effector pathways controlling: (i) cell proliferation; (ii) epithelial  
28 morphology and (iii) intracellular organisation.

29

30 **Abstract**

31 The tumour suppressor adenomatous polyposis coli (Apc) regulates diverse effector pathways  
32 essential for cellular homeostasis. Truncating mutations in Apc, leading to the loss of its Wnt  
33 pathway and microtubule regulatory domains, are oncogenic in human and murine intestinal  
34 epithelia and drive malignant transformation. Whereas uncontrolled proliferation via Wnt  
35 pathway deregulation is an unequivocal consequence of oncogenic Apc mutations, it is not  
36 known whether loss of its other control systems contribute to tumorigenesis. Here we employ  
37 *in vitro* models of tumorigenesis to unmask the molecular barriers erected by Apc that  
38 maintain normal epithelial homeostasis in the murine intestinal epithelia. We determine that  
39 (i) enterocyte proliferation, (ii) microtubule dynamics and (iii) epithelial morphology are  
40 controlled by three independent molecular pathways, each corrupted by oncogenic Apc  
41 mutations. The key result of the study is to establish that Apc regulates three individual  
42 biological fates in the intestinal epithelia, through three distinct effector pathways, a  
43 significant advance to our understanding of normal tissue homeostasis, the molecular  
44 architecture of epithelial tissue and the aetiology of intestinal cancer.

45

## 46 Introduction

47 The intestinal tract (small intestine and colon) hosts a highly dynamic enterocyte monolayer  
48 that undergoes complete self-renewal every 3-5 days. The basic units of the intestinal  
49 epithelium are adjacent invaginations, termed crypts of Lieberkühn (Fig. 1A, B), each of which  
50 serves as a semi-autonomous cell production factory with a remarkably high proliferation rate  
51 - along the murine intestinal tract, crypts are composed of an average of 700 cells that  
52 produce up to 20 cells per hour in the small intestine or 7 cells per hour in the colon (de  
53 Rodriguez et al., 1978; Potten et al., 1982; Sunter et al., 1979). Throughout the enterocyte  
54 monolayer, each cell is spatially restricted, selective for homo- and hetero-typic cell-specific  
55 interactions, and is highly polarised with defined apical, lateral and basal faces, all  
56 characteristics critical to epithelial barrier and transport functions. The hierarchal  
57 organisation of the enterocyte monolayer, from the stem cells at the base of crypts to  
58 differentiated cells within the gut lumen, is achieved through molecular control of the balance  
59 between rapid cellular proliferation and morphological organisation of the epithelial  
60 monolayer (Gehart and Clevers, 2019).

61 Malignant transformation as a result of mutational inactivation of the tumour suppressor  
62 gene *adenomatous polyposis coli* (*APC*) compromises tissue organisation of the intestinal  
63 epithelium (Dow et al., 2015; Kinzler, Kenneth W. and Vogelstein, 1996; Volgestein and  
64 Fearon, 1990). Somatic mutations in *APC* are widely regarded as the initiating event of 80-90  
65 % of sporadic colon cancers (Grodin et al., 1991). Perhaps surprisingly, mutational  
66 inactivation of *APC* reveals an oncogenic vulnerability largely restricted to the intestinal  
67 epithelium. Thus, individuals with familial adenomatous polyposis (FAP) that are  
68 heterozygous for a germline mutation inactivating one allele of *APC* (Su et al., 1992) exhibit  
69 spontaneous loss of heterozygosity that leads to hundreds of tumours, all of which are  
70 restricted to the intestinal epithelium. The murine model of FAP, *Apc*<sup>Min/+</sup> (multiple intestinal  
71 neoplasia; *Min*), follows a similar pattern of tumour development—despite mono-allelic  
72 inactivation of *Apc* in every cell in the body, tumorigenesis is almost exclusive to the intestinal  
73 epithelium (Moser et al., 1990; Moser et al., 1995; Su et al., 1992).

74 *Apc* is a large multi-domain protein that governs a plethora of effector pathways regulating  
75 cellular and tissue homeostasis (Nelson and Näthke, 2013). *Apc*'s molecular roles are  
76 generally ascribed to the regulation of Wnt pathway activity, a key determinant of stem cell

77 multipotency and proliferation within the crypt. Pathway activity is sustained within the stem  
78 cell niche by redundant sources of Wnt ligands derived from adjacent Paneth cells or the  
79 underlying mesenchyme (Aoki et al., 2016; Farin et al., 2012; Gregorieff et al., 2005;  
80 Stzepourginski et al., 2017; Valenta et al., 2016; Zou et al., 2018) and potentiated by cellular  
81 engagement of R-spondins, also derived from specific mesenchymal cells (Yan et al., 2017).

82 APC inactivation is one of the earliest known lesions in colorectal cancer and follows an  
83 unusual pattern of somatic changes – at least one APC allele harbours mutations that are  
84 largely confined to a short segment within *exon 15* of the gene referred to as the mutation  
85 cluster region (MCR; Fig. 1C, S1), resulting in the expression of truncated Apc. The other allele  
86 is most often silenced or incurs the same or a more severe truncating mutations (Crabtree et  
87 al., 2003; Lamlum et al., 1999; Rowan et al., 2000). Truncating mutations in *exon 14* of the  
88 mouse *Apc* gene found in the *Min* mouse line (Fig. 1C, S1), equivalent to human *exon 15*,  
89 display many features common with human colorectal cancer.

90 The truncated Apc protein lacks regulatory protein-protein interaction domains for the Wnt  
91 pathway regulators  $\beta$ -catenin and Axin (Fig. 1C, S1), explaining oncogenic Wnt pathway  
92 activation upon loss of heterozygosity in murine models. Extensive investigation of oncogenic  
93 Wnt pathway activity in cells lacking APC has ascribed a key role in the regulation of intestinal  
94 epithelial cell proliferation through the Wnt pathway target gene *c-Myc* (Dave et al., 2017; He  
95 et al., 1998; Oskarsson and Trumpp, 2005; Sansom et al., 2007; Sur et al., 2012).

96 Truncated Apc protein also lacks the C-terminal microtubule end binding protein 1 (EB1)  
97 binding domain and a basic domain thought to bind directly to microtubules (Fig. 1C) (Deka  
98 et al., 1998). However, the molecular consequence of C-terminal Apc truncations and removal  
99 of the microtubule and EB1 binding domains is controversial. Apc mediated stabilisation of  
100 microtubules via its C-terminal domains supports the establishment of parallel arrays of  
101 microtubules in a polarised cell (Mogensen et al., 2002; Zumbunn et al., 2001) and APC is  
102 known to regulate cytoskeletal rearrangements that accompany cell motility, cell division and  
103 tissue organisation through control of microtubule dynamics (Moseley et al., 2007;  
104 Munemitsu et al., 1994; Näthke, 1996; Smith et al., 1994). It is not clear, if the truncating  
105 mutations in APC decrease its binding to microtubules or its capacity to stabilize the  
106 microtubule ends (Munemitsu et al., 1994; Smith et al., 1994)(Karin Kroboth et al., 2007;  
107 Zumbunn et al., 2001). Furthermore, loss of Apc C-terminal microtubule and EB1 interaction

108 domains in mouse embryonic fibroblasts and differentiated embryonic stem cells does not  
109 affect the distribution of  $\beta$ -tubulin, EB1 and Apc (Lewis et al., 2012; Smits et al., 1999).

110 *In vivo* mouse models have investigated whether loss of Apc's C-terminal microtubule and  
111 EB1 binding domains are sufficient to drive intestinal epithelial tumorigenesis. *Apc*<sup>1638T/1638T</sup>  
112 mice express a version of Apc lacking the C-terminal domains but retaining the ability to  
113 regulate Wnt pathway activity (Fig. 1C, S1) and do not present with intestinal epithelial  
114 tumours (Smits et al., 1999). Conversely, *Apc* <sup>$\Delta$ SAMP/+</sup> mice expressing a version of Apc unable  
115 to regulate Wnt pathway activity but retaining the microtubule and EB1 binding domains (Fig.  
116 S1) develop tumours with the same frequency and kinetics as the corresponding *Apc*<sup>1322/+</sup>  
117 mice that express Apc lacking these domains (Fig. S1) (Lewis et al., 2012). Thus, Apc's ability  
118 to interact with microtubules and EB1 does not, on its own, drive intestinal epithelial  
119 tumorigenesis. Nonetheless, the potential contribution of loss of the APC microtubule and  
120 EB1 binding domains to intestinal tumorigenesis has not been determined.

121 Herein, we stratify functions of Apc in the murine intestinal epithelia by defining the  
122 molecular and phenotypic differences in the small intestinal epithelia and corresponding  
123 organoids that arise upon loss-of-function. In addition to deregulated cell proliferation, we  
124 find that Apc inactivation disrupts intestinal epithelial morphology and compromises  
125 microtubule dynamics in component enterocytes. Although the three emergent malignant  
126 properties are the direct consequence of Apc inactivation, they are controlled by different  
127 molecular systems. Therefore, (i) enterocyte proliferation, (ii) microtubule dynamics and (iii)  
128 epithelial morphology are regulated by three separate effector pathways, under the control  
129 of Apc, that bulwark normal intestinal epithelial homeostasis against malignant  
130 transformation.

131

## 132 **Results**

### 133 **Compromised intracellular organisation and tissue morphology in *Apc*<sup>Min/-</sup> tumours**

134 Over the course of 110 days, *Apc*<sup>Min/+</sup> mice develop 30-40 adenomas in the small intestine, the  
135 result of loss of heterozygosity of the wild type *Apc* allele (Moser et al., 1995; Su et al., 1992).  
136 Such *Apc*<sup>Min/-</sup> tumours are composed of gland-like structures that maintain a columnar  
137 epithelial monolayer yet lack the morphological hallmarks of crypt and villus compartments

138 and the hierarchal cellular organisation of the wild type epithelia (Fig. 1A). For instance, Ki67<sup>+</sup>  
139 proliferative stem cells and the transit amplifying cellular compartment, normally disposed  
140 supra-basally within crypts, are instead interspersed throughout the monolayer of the tumour  
141 gland-like structures (Fig. 1B). Moreover, a fluorescent probe of apically-localised secretory  
142 vesicles (fluorescently-labelled *Ulex Europaeus* agglutinin; fUEA) found in the mechanically  
143 rigid, keystone-shaped Paneth cells in wild-type tissues (Langlands et al., 2016), indicates that  
144 these cells are interspersed throughout the *Apc*<sup>Min/-</sup> glandular monolayer, are of variable  
145 shapes and fail to maintain apical vesicle localisation (Fig. 1B). We also note that, as opposed  
146 to wild type enterocytes, cells within the *Apc*<sup>Min/-</sup> tumour contain nuclei of variable shapes  
147 and sizes that do not align along the plane of the monolayer. We conclude that, in addition to  
148 driving de-regulated epithelial cell proliferation and tissue morphology, Apc inactivation  
149 compromises molecular barriers maintaining some aspects of intracellular organisation.

150

#### 151 **Defective regulation of microtubule function in *Apc*<sup>Min/-</sup> tumours**

152 The cytoskeleton provides the physical framework for intracellular organisation and cell  
153 polarity defined by dynamic polymerisation/depolymerisation of actin and tubulin monomers  
154 (Li and Gundersen, 2008; Rodriguez-Boulan and Macara, 2014). Apc harbours an array of  
155 protein-protein interaction domains with established roles in regulating F-actin and  
156 microtubule dynamics within intestinal epithelial cells (Fig. 1C)(Kawasaki et al., 2000;  
157 Munemitsu et al., 1994; Näthke, 2004; Rosin-Arbesfeld et al., 2001; Tirnauer, 2004; Zumbunn  
158 et al., 2001). We examined the localisation of the cytoskeleton in intestinal epithelial and  
159 *Apc*<sup>Min/-</sup> tumour cells, using a series of fluorescent probes for F-actin, microtubules and known  
160 protein interactors. Consistent with a previous study (Fatehullah et al., 2013), *Apc*<sup>Min/-</sup> tumour  
161 cells maintained the correct disposition and configuration of actin cytoskeletal components—  
162 F-actin was concentrated along the apical face of the epithelial cells (Pelaseyed and Bretscher,  
163 2018), the tight junction organiser ZO-1 was positioned apically at cellular junctions (Lee et  
164 al., 2018) and integrin-β4, which anchors enterocytes to the underlying lamina propria,  
165 localised to the cell base (Fatehullah et al., 2013) (Fig. 2A).

166 In contrast, components of the microtubule cytoskeleton in *Apc*<sup>Min/-</sup> tumour cells were  
167 disorganised; microtubules, normally orientated along the apical-basal axis were instead  
168 disjointed and diffuse (Fig. 2B). We used an antibody raised against the acetylated form of α-

169 tubulin and found that the signal was concentrated at the apical domain of cells, in line with  
170 previously published data (Quinones et al., 2011). However, in tumour cells, acetylated  $\alpha$ -  
171 tubulin was instead de-localised and diffuse (Fig. 2B). We also determined the localisation of  
172 intracellular organelles whose location and disposition are dependent on the microtubules.  
173 Predictably, we found that the normally strict basal positioning of nuclei, apical positioning of  
174 intracellular vesicles and the supra-apical localisation of the Golgi resident protein ZFLP1 and  
175 the centrosome marker pericentrin in wild type intestinal epithelia was lost in *Apc*<sup>Min/-</sup> tumour  
176 cells (Fig. 2C). To preclude de-localisation of the Golgi as the consequence of cells undergoing  
177 cell division, we co-stained intestinal epithelial sections with an antibody to the mitotic  
178 marker phospho-histone 3 (PH3; Fig. 2C) - tumour cells that displayed de-localised Golgi did  
179 not express detectable levels of PH3. Taken together, our data supports normal localisation  
180 of the actin cytoskeleton and associated components within *Apc*<sup>Min/-</sup> intestinal epithelial  
181 tumour cells, whereas the localisation and functional integrity of the microtubules is  
182 compromised.

183 We reasoned that the C-terminal microtubule and EB1 binding domains of Apc may be critical  
184 for the regulation of the microtubule cytoskeleton. The *Apc*<sup>1638T/1638T</sup> mouse strain is  
185 homozygous for a truncating mutation in Apc that deletes the C-terminal microtubule and  
186 EB1 binding domains. However, *Apc*<sup>1638T</sup> protein retains the Axin interaction domain unlike  
187 that expressed in *Apc*<sup>Min/+</sup> mice (Fig. 1C) and therefore retains regulatory control over Wnt  
188 pathway activity; as a result, *Apc*<sup>1638T/1638T</sup> mice do not develop intestinal epithelial tumours  
189 (Smits et al., 1999). Since the small intestine epithelia of *Apc*<sup>1638T/1638T</sup> mice exhibit normal  
190 localisation of intact Golgi and fUEA-positive Paneth cell vesicles (Fig. S2), we conclude that  
191 loss of the Apc microtubule and EB1 binding domains alone does not compromise regulation  
192 of the microtubule cytoskeleton or intestinal epithelial morphology.

193

### 194 **Organoids accurately recapitulate the molecular and phenotypic consequences of APC** 195 **inactivation in the intestinal epithelium**

196 We generated organoid lines from wild-type, *Apc*<sup>Min/+</sup> intestinal epithelia and *Apc*<sup>Min/-</sup> tumour  
197 cells as an experimentally tractable model system for determining the molecular mechanisms  
198 linking Apc to microtubule integrity and epithelial morphology. Organoids derived from  
199 normal tissue form an epithelial monolayer, replete with crypts, that maintains the three-



200 dimensional cellular organisation and hierarchy found *in vivo*. In contrast, tumouroids,  
201 organoids derived from *Apc*<sup>Min/-</sup> tumour cells, form cystic structures lacking morphological  
202 features of the intestinal epithelial monolayer such as crypts (Sato et al., 2011).

203 Using a series of fluorescent probes, we found that F-actin and associated molecular  
204 components, ZO-1 and integrin- $\beta$ 4, maintained their intracellular localisation in both organoid  
205 and tumouroid cells (Fig. 3A). However, consistent with our observations in intestinal  
206 epithelial tissue from *Apc*<sup>Min/-</sup> tumours, the organisation and function of the microtubule  
207 cytoskeleton was compromised. Notably,  $\beta$ -tubulin was no longer polarised in microtubules  
208 along the apical-basal axis of cells but was instead dispersed throughout all of the cells,  
209 acetylated  $\alpha$ -tubulin was de-localised (Fig. 3B), nuclei varied in shape and size and did not  
210 follow the plane of the tumouroid monolayer and centrosomes and Golgi were split into  
211 multiple puncta that were distributed throughout the cell body (Fig. 3C); within individual  
212 tumouroid cells, the Golgi and the centrosome were no longer positioned apically in over 40%  
213 of cases (Fig. 3D).

214 Taken together, our organoid data confirms that Apc inactivation in the intestinal epithelial  
215 monolayer leads to deregulation of microtubule dynamics and loss of intracellular  
216 organisation with the absence of detectable effects on the actin cytoskeleton.

217

### 218 **Apc deficiency directly compromises intracellular organisation and tissue morphology**

219 It is possible that intestinal epithelial tumours from 110-day old *Apc*<sup>Min/+</sup> mice, and organoids  
220 derived from them, have acquired additional somatic changes that contribute to phenotype.  
221 To determine the immediate and direct effects of Apc inactivation we created a switchable  
222 organoid model of tumorigenesis that relies on the inducible expression of a previously-  
223 validated shRNA targeting Apc (Dow et al., 2015) (Fig. S3A). shApc expression in organoids  
224 depletes Apc expression concurrent with the expression of mCherry and leads to the intra-  
225 conversion of organoids into a cystic tumoroid structure (Fig. S3B-D). Importantly, we observe  
226 increased expression of the Wnt pathway target gene *c-Myc* (Fig. S3E).

227 Consistent with the appearance of *Apc*<sup>Min/-</sup> tumours and tumoroids, Apc depletion in  
228 organoids resulted in mis-localisation of Paneth cell vesicles and Golgi and centrosome  
229 fragmentation and dispersion (Fig. 4A). Importantly, all hallmarks of intracellular

230 disorganisation and compromised tissue morphology were reversed upon Apc re-expression,  
231 leading to the appearance of 'normal' organoids (Fig. 4A). Our switchable *in vitro*  
232 tumorigenesis model confirms that compromised epithelial morphology and intracellular  
233 disorganisation are a direct consequence of Apc inactivation.

234

### 235 **Apc regulation of intestinal epithelial morphology and microtubule dynamics are discrete**

236 Ubiquitous activation of Wnt pathway activity in organoid cells by treatment with Wnt3A  
237 conditioned media leads to the intra-conversion of organoids into cystic tumour-like  
238 structures (Farin et al., 2012) that we refer to as Wnt-oids (Fig. 4B). Although the morphology  
239 of the Wnt-oid epithelial monolayer is compromised, they are distinct from tumouroids in  
240 that the Golgi, centrosome and Paneth cell vesicles retain their normal apical position in  
241 component cells (Fig. 4B) – greater than 80% of Wnt-oid cells show apical localisation of the  
242 Golgi and centrosome as opposed to less than 60% in tumouroid cells (Fig. 4B). We conclude  
243 that Apc regulation of intestinal epithelial morphology through Wnt pathway regulation is not  
244 coupled to its function in regulating microtubule dynamics and intracellular organisation.

245 We carried out the complimentary experiment, selectively deregulating microtubule  
246 dynamics in organoids and determining the consequence on epithelial morphology. We  
247 treated organoids with a low concentration (100 nM) of the microtubule depolymerising  
248 agent nocodazole (Vasquez et al., 1997) for 48 hours, a timepoint sufficient for the conversion  
249 of organoids to Wnt-oids with Wnt3A treatment. Treated organoid and Wnt-oid cells  
250 displayed the characteristic mis-localisation of fragmented Golgi and centrosomes that was  
251 reversed after 24 hours post-nocodazole withdrawal (Fig. 4C). Importantly, throughout the  
252 experiments, nocodazole-treated organoids maintain intestinal epithelial crypts structures  
253 (Fig. 4C) indicating that maintenance of intestinal organisation and microtubule dynamics are  
254 not dependent on one another. Combined with our Apc loss-of-function studies, these data  
255 suggest that Apc-dependent control of intracellular organisation and epithelial morphology  
256 rely on independent molecular circuits.

257

258 **Apc control of intestinal epithelial morphology is independent of the Wnt pathway target**  
259 **gene c-Myc**

260 Previous studies have indicated that Apc inactivation in the intestinal epithelia leading to Wnt  
261 pathway-dependent expression of *c-Myc* is the critical mediator of malignant transformation  
262 *in vivo* (Dave et al., 2017; Sansom et al., 2006; Sur et al., 2012). We reasoned that blocking *c-*  
263 *Myc* gene activation via Wnt pathway in organoids would attenuate phenotypes imposed by  
264 Apc inactivation. We derived organoids from an engineered mouse line lacking a Wnt  
265 pathway response element in the *c-Myc* promoter (the *Myc-335<sup>-/-</sup>* allele; Fig. S4) (Sur et al.,  
266 2012). *Myc-335<sup>-/-</sup>* mice grow normally and importantly, are resistant to intestinal  
267 tumorigenesis in an *Apc<sup>min/+</sup>* background (Sur et al., 2012). Wnt3A conditioned media  
268 treatment of *Myc-335<sup>-/-</sup>* and wild-type organoids indicated identical kinetics and frequency of  
269 Wnt-oid formation (Fig. 5A, B) that retained the normal Golgi apical localisation (Fig. 5C).  
270 Within the 7-day time course of Wnt3A treatment, we observed no changes in growth rate  
271 between wild-type and *Myc-335<sup>-/-</sup>* organoids (Fig. 5D). Taken together, our data indicate that  
272 regulation of intracellular organisation and epithelial tissue morphology by Wnt pathway  
273 activity is independent of *c-Myc* expression.

274

## 275 Discussion

276 In this study, we unmasked individual molecular systems controlled by Apc in the intestinal  
277 epithelia through loss-of-function. Oncogenic Apc mutations are the principle driver of colon  
278 epithelial tumorigenesis and sufficient for malignant transformation of the colon and small  
279 intestinal epithelia. We stratify three emergent phenotypes in the murine intestinal epithelia  
280 that are the direct consequence of oncogenic Apc mutations: de-regulated proliferation,  
281 disrupted epithelial morphology and compromised microtubule dynamics leading to  
282 defective intracellular organisation.

283 In the intestinal epithelia, Apc activity restricts enterocyte proliferation through stringent  
284 control of the Wnt pathway-dependent transcriptional programme. In particular, regulated  
285 expression of the Wnt pathway target gene, *c-Myc*, constrains proliferation to discrete,  
286 localised niches, providing a key molecular barrier to malignant transformation (Dave et al.,  
287 2017; Quyn et al., 2010; Sur et al., 2012); whereas oncogenic Apc mutations in the intestinal  
288 epithelia are sufficient to drive neoplastic growth, the absence of *c-Myc* expression  
289 attenuates all transforming properties of Apc inactivation, *in vivo* (Sansom et al., 2006). Less  
290 well understood is how oncogenic Apc mutations deregulate epithelial morphology and

291 intracellular organisation. We have established that organoids and their Apc-deficient  
292 counterparts, tumoroids, are a tractable model that effectively recapitulate the  
293 morphological and organisational hallmarks modelling the transition between intestinal  
294 epithelia and tumours.

295 Treatment of organoids with Wnt3A drives their intra-conversion into cystic tumouroid-like  
296 structure, termed Wnt-oids that, in contrast to tumoroids, maintain intracellular organisation  
297 of the component cells. Our interpretation is that Wnt3A treatment leads to selective  
298 inhibition of Wnt pathway regulation by Apc, compromising constraints on epithelial  
299 morphology, but retaining the integrity of the microtubule cytoskeleton and intra-cellular  
300 organisation – supporting the notion that regulation of epithelial morphology and  
301 cytoskeletal integrity are uncoupled. Conversely, selective destabilisation of microtubules  
302 compromises intracellular organisation in component organoid cells, yet normal morphology  
303 of the epithelia monolayer is retained. Taken together, our data support a model whereby  
304 Apc controls enterocyte proliferation and epithelial morphology through Wnt pathway  
305 regulation and regulates the microtubule cytoskeleton and intracellular organisation through  
306 other, separate pathways (Figure 5D).

307 How then does Apc regulation of Wnt pathway activity impact the morphology of the  
308 epithelial monolayer? Our data support direct control of epithelial morphology by Wnt  
309 pathway activity rather than an inability of organisational constraints to cope with exuberant  
310 proliferation. In the intestinal epithelia, neoplastic growth is the result of precocious Wnt  
311 pathway target gene expression driving deregulated expression of the Wnt pathway target  
312 gene, *c-Myc*. Although deregulated *c-Myc* expression is regarded as the major culprit in all  
313 transforming phenotypes attributed to Apc loss *in vivo* (Sansom et al., 2007), we find that Wnt  
314 pathway-dependent control of *c-Myc* expression has no influence on intestinal epithelial  
315 morphology or cellular organisation. Moreover, within the timeframe of our experiments, we  
316 did not observe any changes in the rate of proliferation accompanying the intra-conversion  
317 of organoids to Wnt-oids. We conclude that compromised epithelial morphology, as a result  
318 of Apc inactivation, is not dependent on deregulated *c-Myc* expression, nor is it the result of  
319 increased proliferative pressure on organisational constraints on the epithelial monolayer.

320 It will be important to identify Wnt pathway targets that control intestinal epithelial  
321 morphology – we anticipate that targeted modulation of such genes may provide therapeutic

322 value for preventing or even reversing the compromised epithelial morphology accompanying  
323 malignant transformation of the intestinal epithelia. The intra-conversion between organoids  
324 and Wnt-oids is a ready-made assay system for rapidly testing sufficiency of Wnt pathway  
325 candidate target genes by their targeted loss of function; a list of such candidates has been  
326 previously identified by Sansom and colleagues (Sansom et al., 2007).

327 One striking observation was that Apc regulates the integrity of the microtubule cytoskeleton  
328 and likely, as a consequence, the intracellular location of organelles such as the nucleus, Golgi,  
329 centrosome and intracellular vesicles. Although control of the microtubule cytoskeleton may  
330 be mediated directly by the Apc C-terminal microtubule and/or EB1 binding domains  
331 (Morrison et al., 1998; Munemitsu et al., 1994), it is also possible that Wnt pathway regulatory  
332 components downstream of Apc or even Wnt pathway transcriptional targets contribute to  
333 microtubule integrity. For example, truncated Apc in *Apc*<sup>1638T/1638T</sup> mice retains the ability to  
334 regulate Wnt pathway activity and maintain the integrity of the microtubule cytoskeleton  
335 (Smits et al., 1999). Our interpretation is that regulation of the Wnt pathway suppresses  
336 defects in the microtubule cytoskeleton, *in vivo*. It remains to be determined whether this is  
337 the case in the intestinal epithelial-autonomous milieu of *in vitro* organoid culture.

338 In colon cancer, oncogenic mutations that inactivate Apc are 10-fold more prevalent than  
339 oncogenic mutations in other Wnt pathway regulatory components suggesting that functions  
340 other than Wnt pathway deregulation contribute to disease aetiology. Although  
341 compromised microtubule integrity is a likely consequence of Apc truncations that delete C-  
342 terminal microtubule and EB1 binding domains, it is unlikely to impact tumorigenesis—the  
343 presence of C-terminal microtubule and EB1 binding domains in truncated versions of Apc has  
344 no impact on tumorigenesis (Lewis et al., 2012). However, one intriguing possibility is that  
345 compromised microtubule integrity in Apc mutant tumour cells contributes to chromosome  
346 instability (CIN). CIN is a feature of the evolution of aggressive colorectal adenocarcinoma  
347 right from the outset, evident in the smallest adenomas and multiple reports have directly  
348 linked oncogenic APC mutations in CRC with a predisposition to CIN (Dikovskaya et al., 2007;  
349 Fodde et al., 2001; Kaplan et al., 2001). Importantly, embryonic stem cells derived from  
350 *Apc*<sup>1638T/1638T</sup> mice develop hallmarks of CIN (Fodde et al., 2001) and overexpression of  
351 truncated APC lacking the C-terminal domains in chromosomally stable colorectal cancer cells  
352 leads to mitotic defects, including errors in kinetochore attachment and alignment of

353 chromosomes (Green and Kaplan, 2003; Tighe et al., 2004). However, the molecular  
354 relationship between Apc loss, microtubule deregulation and chromosome instability in the  
355 intestinal epithelia has yet to be established. The experimentally tractable  
356 organoid/tumouroid model system we have developed will be invaluable in determining the  
357 role of Apc in the loss of microtubule integrity and the impact of CIN in intestinal  
358 tumorigenesis.

359 Our results distinguish individual malignant properties of intracellular disorganisation,  
360 compromised tissue morphology and proliferation as direct, but separable consequences of  
361 Apc inactivation; we posit that the combination of these emergent properties creates a  
362 'perfect storm' for malignant transformation of the rapidly dividing intestinal epithelia,  
363 explaining why this tissue is particularly vulnerable to oncogenic Apc mutations.

364

365

## 366 **Materials and Methods**

### 367 **Reagents, antibodies and molecular probes**

368 Doxycycline and nocodazole were sourced from Sigma-Aldrich and used at concentrations of  
369 2 µg/ml and 100 nM, respectively. Wnt3A conditioned media was harvested from Wnt3A-  
370 expressing L-cells (ATCC, CRL-2647) according to a previously established protocol (Willert et  
371 al., 2003). The media was stored for up to two months at 4°C without any detectable loss of  
372 Wnt3A activity. Antibodies and molecular probes used for fluorescence microscopy are listed  
373 in Table 1.

374

### 375 **Tissue preparation and fluorescent labelling**

376 All procedures using mice were performed under the UK Home Office guidelines. Intestines  
377 obtained from wild-type CL57BL/6, *Apc*<sup>1638T/1638T</sup>, *Apc*<sup>Min/+</sup> CL57BL/6, *Apc*<sup>fl/fl</sup> *LSL tdTom* (a gift  
378 from Winton laboratory) and *Myc-335*<sup>-/-</sup> (a gift from Taipale laboratory) mice were either fixed  
379 in 4% formaldehyde and embedded in paraffin or fixed-frozen in 10% formalin and embedded  
380 in optimal cutting temperature (OCT) liquid, followed by snap freezing (fresh-frozen tissue).

381 Small intestinal epithelial sections (4% formaldehyde-fixed or fresh frozen) for molecular  
382 probe and antibody labelling were cut at a thickness of 4.5 µm onto slides. The exception was  
383 slides labelled with β-tubulin or acetylated-tubulin in which case 20 µm thick formaldehyde-  
384 fixed sections were cut onto poly-L-lysine coated slides.

385 For formaldehyde-fixed samples, epitope retrieval was performed in sodium citrate buffer  
386 (sodium citrate 10 mM, 0.05 % Tween-20, pH 6.0). Primary antibody incubations were carried  
387 out at 4°C overnight and secondary antibody incubation for 2 hours at room temperature,  
388 both in PBS containing normal goat serum (5%) and 0.1% Tween20. Samples were mounted  
389 in DAPI-containing Fluoromount-G (Thermo-Fisher).

390

### 391 **Organoid preparation and fluorescent labelling**

392 Murine small intestinal epithelial organoids were derived from the ileum of mouse small  
393 intestine according to Sato et al. 2013 (Sato and Clevers, 2013). Tumoroids were derived from  
394 tumours within the ileum of 110 day-old *Apc*<sup>Min/+</sup> mice (Haigis et al., 2004). All organoids and  
395 tumoroids were cultured according to Urbischek et al. 2018 (Urbischek et al., 2019).

396 Organoids were seeded in Matrigel onto eight-well chamber slides (ThermoFisher) 48 hours  
397 prior to fluorescent labelling. Organoids were fixed in 92% methanol containing 8%  
398 formaldehyde and labelled following a published protocol (Goldspink et al., 2017). Organoids  
399 in primary antibody were incubated at 4°C overnight. The next day the slides were incubated  
400 at room temperature for 1 hour (allowing the Matrigel to harden), washed and then  
401 incubated for 1 hour at room temperature in the secondary antibody. Labelled organoid  
402 samples were then mounted in DAPI-containing Fluoromount-G.

403

#### 404 **Organoid and tissue imaging and data analysis**

405 Fluorescent imaging of tissue was carried out using a Nikon C2 plus confocal microscope using  
406 40X objective lens. Images were processed using ImageJ software. Fluorescent labelling of  
407 each antibody was repeated a minimum of three times.

408 Imaging of organoids was done using Nikon C2 plus confocal microscope using the 20X and  
409 40X objectives and an automated spinning disc confocal microscope (YOKOGAWA Cell  
410 Voyager CV8000) using 40X objective. Z-stacks were taken at 1 µm steps. Images were  
411 processed and published using ImageJ software. All figures presented are representative  
412 images from a single plane within the Z-stack of the imaged specimen. For the quantification  
413 of organelle positioning within organoids, approximately 200 cells were counted per  
414 experiment manually.

415

#### 416 **Plasmids and organoid expression**

417 The *piggybac* transposon and *tet-on* expression system was a kind gift from Bon-Kyoung Koo.  
418 The previously validated shRNA targeting mouse *Apc* (Dow et al., 2015) was inserted into the  
419 tet-responsive shRNA expression vector, pB-TRE-IRES-mCherry. The three plasmid system  
420 also consists of pB-CAG-rtTA, the vector for constitutive rtTA expression, and pPiggybac, the  
421 expression vector for constitutive expression of the *piggybac* transposase (Fujii et al., 2015).

422 The shApc organoid line was generated by transfection of the pB-TRE-shApc-IRES-mCherry,  
423 pPiggybac and pB-CAG-rtTA plasmids (Fig. S3A) using a NEPA21 electroporator according to a  
424 previously published protocol (Fujii et al., 2015). Organoids were selected for integration of  
425 constructs in organoid media containing Wnt3A conditioned media (Urbischek et al., 2019)



426 supplemented with 150 µg/ml Hygromycin B (ThermoFisher) for 7 days, after which the media  
427 was switched to organoid media (Urbischek et al., 2019).

428

#### 429 **Validation of shApc organoid line**

430 For western blotting, organoids were recovered from Matrigel using several rinses of ice-cold  
431 phosphate buffered saline (PBS) and the pellet was lysed with 50 µl 1X RIPA buffer (Millipore)  
432 containing protease (Sigma) and phosphatase inhibitors (Roche). Samples were loaded onto  
433 NuPAGE 3-8 % Tris-Acetate gradient gels (ThermoFisher) prior to transfer onto PVDF  
434 membrane. Antibodies used for probing membranes in PBS containing 0.2% Tween 20 and  
435 5% non-fat milk are in Table 1.

436 Expression levels of Apc and mCherry were determined by qRT-PCR. RNA was isolated from  
437 organoids and tumoroids using the ReliaPrep RNA Cell Miniprep System kit (Promega) and  
438 cDNA was prepared using the High Capacity cDNA Reverse Transcription kit (ThermoFisher)  
439 all according to manufacturers' instructions. qRT-PCR was carried out using Fast SYBR Green  
440 Master Mix using a QuantStudio 5 real-time PCR system (both Applied Biosystems). B2m was  
441 used as a housekeeping gene and relative fold changes in Apc and mCherry expression were  
442 derived from  $\Delta\Delta CT$ . The following primers were used: Apc (Forward:  
443 AGCCATGCCAACAAAGTCATCACG; reverse: TTCCTTGCCACAGGTGGAGGTAAT), mCherry  
444 (Forward: CACGAGTTCGAGATCGAGGG; reverse: CAAGTAGTCGGGGATGTCGG) and B2m  
445 (Forward: ACCCCCACTGAGACTGATAC; reverse: ATCTTCAGAGCATCATGATG).

446

#### 447 **Acknowledgements**

448 The authors thank Nami O. Yamada and Wenduerma for technical assistance, Thomas Foets  
449 and Manuela Urbischek for discussions of the work and Trevor Littlewood for critical review  
450 of the manuscript. This work was supported by a PhD studentship project funded by  
451 AstraZeneca to H.R.

452

#### 453 **Competing interests**

454 The authors declare no competing interests.

455 **Table 1. Antibodies and molecular probes used for fluorescence confocal microscopy.**

456 Except for phalloidin and the antibody to  $\beta$ 4-integrin that required the use of fresh-frozen  
 457 tissue (see below), all fixation prior to labelling with antibodies and molecular probes was  
 458 performed using 4% formaldehyde.

|                         | Conjugate           | Company               | Catalogue number | Dilution |
|-------------------------|---------------------|-----------------------|------------------|----------|
| <b>Antibodies</b>       |                     |                       |                  |          |
| Acetylated tubulin      | Alexa Fluor 647     | Gift from E. Derivery |                  | 1:300    |
| $\beta$ -catenin        |                     | BD Biosciences        | 610153           | 1:200    |
| $\beta$ -tubulin        |                     | CST                   | 2146             | 1:200    |
| $\beta$ 4-integrin      |                     | Abcam                 | ab25254          | 1:200    |
| c-MYC                   |                     | Abcam                 | ab32072          | 1:1000   |
| Ki67                    |                     | ThermoFisher          | MA5-14520        | 1:200    |
| Lysozyme                |                     | Dako                  | A0099            | 1:200    |
| Pericentrin             |                     | Abcam                 | ab4448           | 1:200    |
| Phospho-histone 3 (PH3) |                     | CST                   | 9701             | 1:200    |
| Vinculin                |                     | CST                   | 4650             | 1:5000   |
| ZFPL1 (Golgi)           |                     | Sigma                 | HPA014909        | 1:200    |
| ZO-1                    |                     | Millipore             | MABT11           | 1:200    |
| Rat IgG                 | Alexa Fluor 488/555 | ThermoFisher          | A-11006, A-21434 | 1:500    |
| Rabbit IgG              | Alexa Fluor 488/555 | ThermoFisher          | A-11008, A-21428 | 1:500    |
| Mouse IgG               | Alexa Fluor 488/555 | ThermoFisher          | A-21422, A-11001 | 1:500    |
| Rabbit IgG              | HRP                 | Abcam                 | ab6721           | 1:10000  |
| Mouse IgG               | HRP                 | Abcam                 | ab6789           | 1:10000  |
| <b>Molecular probes</b> |                     |                       |                  |          |
| DAPI                    |                     | SouthernBiotech       | 0100-20          |          |
| Phalloidin              | Alexa Fluor 488     | ThermoFisher          | A12379           | 1:500    |
| UEA-1 (fUEA)            | Rhodamine           | Vector laboratories   | RL-1062          | 1:2000   |

459

460

461 **Figure legends**

462

463 **Figure 1. Compromised morphology of the monolayer and cellular organisation in Apc**  
464 **deficient intestinal epithelia. A.** Haematoxylin and eosin stain of normal  $Apc^{Min/+}$  murine  
465 intestinal epithelia and adjacent  $Apc^{Min/-}$  tumour. Outsets illustrate crypt units for normal  
466  $Apc^{Min/+}$  murine intestinal epithelia and gland-like structures in  $Apc^{Min/-}$  tumours. Scale bars,  
467 200  $\mu\text{m}$ . **B.** Fluorescent confocal microscope imaging of small intestinal epithelial sections  
468 from an  $Apc^{Min/+}$  mouse. *Left panel* - normal, haplo-sufficient  $Apc^{Min/+}$  tissue. *Right panel* -  
469  $Apc^{Min/-}$  tumour. Paneth cell vesicles are marked with fUEA (red), fluorescent antibody to Ki67  
470 (green) marks cycling cells and DAPI (blue) labels nuclei. Scale bars, 50  $\mu\text{m}$ . **C.** Domain  
471 structure of Apc showing protein interaction domains labelled as: oligo - oligomerisation  
472 domain; Arm – armadillo repeat domain; Axin-binding SAMP domain 1-3; MT/basic – the  
473 microtubule binding domain containing basic amino acids; EB1 – EB1-binding domain; ovals  
474 refer to 15- and 20-amino acid  $\beta$ -catenin binding domains (grey and dark grey, respectively).  
475 MCR is the position of the corresponding mutational cluster region in human APC. Also shown  
476 are the relative positions of the germline *Min* and *1638T* mutations in Apc.

477

478 **Figure 2. Apc inactivation does not affect the localisation of the actin cytoskeleton yet**  
479 **compromises microtubule dynamics.** Fluorescence confocal microscopy of small intestinal  
480 epithelia sections (from  $Apc^{Min/+}$  mouse; top panels) and  $Apc^{Min/-}$  tumours, bottom panels. **A.**  
481 Leftmost sections were labelled with fluorescent phalloidin (*green*); the subsequent pairs of  
482 sections were labelled with antibodies to  $\beta$ 4-integrin (*green*),  $\beta$ -catenin (*red*) and ZO-1 (*red*).  
483 **B.** Leftmost section was labelled with an antibody to  $\beta$ -tubulin. Expanded view to the right,  
484 “A” marks the apical domain of cells and “B”, the basal domain. Rightmost section was  
485 labelled with an antibody to acetylated  $\alpha$ - tubulin. **C.** Left panels – sections labelled with fUEA  
486 (red) and an antibody to ZO-1 (*green*); middle panels – sections labelled for the centrosome  
487 using an antibody to pericentrin (*red*); right panels – sections labelled with antibodies to the  
488 Golgi resident protein ZFPL1 (*red*), the cell division marker PH3 (*white*) and ZO-1 (*green*). All  
489 sections were co-labelled with DAPI. Scale bars, 100  $\mu\text{m}$ .

490

491 **Figure 3. Organoids recapitulate the consequences of Apc inactivation in the intestinal**  
492 **epithelia. A.** Fluorescence confocal microscopy of small intestinal epithelial organoids (top  
493 panels) and *Apc*<sup>Min/-</sup> tumouroids (bottom panels). Cells were labelled with fluorescent  
494 phalloidin (green) and antibodies to  $\beta$ 4-integrin (green),  $\beta$ -catenin (red) and ZO-1 (red) as  
495 marked. On the left panel “A” marks the apical domain of cells and “B”, the basal domain. **B.**  
496 Immunofluorescence using antibodies to  $\beta$ -tubulin and acetyl-tubulin as marked. “A” marks  
497 the apical domain of cells and “B”, the basal domain. **C.** Fluorescent sections of small intestinal  
498 epithelial organoids (*left panels*) and *Apc*<sup>Min/-</sup> tumouroids (*right panels*). Top panels were  
499 labelled with fUEA (red) and an antibody to  $\beta$ 4-integrin (green); middle panels were labelled  
500 with antibodies to pericentrin (red) and  $\beta$ 4-integrin (green); bottom panels were labelled  
501 with antibodies to ZFPL1 (red) and ZO-1 (green). All fluorescent sections were co-labelled with  
502 DAPI. Scale bars, 50  $\mu$ m. **D.** The positioning of the Golgi complex and the centrosome was  
503 scored as apical or otherwise according to the scheme in the right panel for >200 cells from  
504 at least three independent experiments. Error bars  $\pm$  SD.

505

506 **Figure 4. Switchable *in vitro* model of tumorigenesis recapitulates the consequences of Apc**  
507 **inactivation in the intestinal epithelia. A.** An organoid line bearing pB-shApc, the *tet-on*  
508 inducible transgene system for induction of shApc expression untreated (top panels),  
509 treatment with doxycycline for 10 days (middle panels) or the former followed by doxycycline  
510 withdrawal for an additional 6 days (lower panels). *Left panels* – fluorescence confocal  
511 microscopy of organoids labelled with fUEA (red) and an antibody to  $\beta$ 4-integrin (green);  
512 *middle panels* – organoids labelled with antibodies to pericentrin (red) and  $\beta$ 4-integrin  
513 (green); *right panels* – organoids labelled with antibodies to ZFPL1 (white)  $\beta$ 4-integrin (green).  
514 **B.** Fluorescence confocal microscopy of organoids and tumoroids treated with Wnt3A  
515 conditioned media for 72 hours. Right panels – quantification of apical localisation of  
516 centrosome and Golgi for the Wnt-oids and tumouroids treated with Wnt3A. Greater than  
517 200 cells from three independent fluorescent sections were analysed using criteria described  
518 in Figure 3D. Error bars  $\pm$  SD. **C.** Fluorescence confocal microscopy of organoids, Wnt-oids and  
519 tumoroids treated with nocodazole followed by fixation and/or withdrawal of drug as  
520 depicted in schematic. Images are representative of the behaviour of 50 organoids that were  
521 analysed per condition from at least two independent experiments. All sections were labelled

522 with fluorescent phalloidin (*green*) and an antibody to ZFPL1 (red). All sections were co-  
523 labelled with DAPI. Scale bars, 50  $\mu\text{m}$ .

524

525 **Figure 5. The Wnt pathway target gene *c-Myc* is not a determinant of tissue morphology**  
526 **and intracellular organisation in *Apc* inactivation. A.** Representative brightfield images of  
527 wild-type and *Myc-335<sup>-/-</sup>* organoids grown in increasing concentrations of Wnt3A conditioned  
528 media for 7 days. Scale bars, 1000  $\mu\text{m}$ . **B.** Quantification of Wnt-oid formation under  
529 conditions described above. Data displayed is derived from a minimum of 200 individual  
530 organoids from two independent experiments for each concentration of Wnt3A conditioned  
531 media. Error bars  $\pm$  SD; nd – not detected; ns – not significantly different. **C.** Average Wnt-oid  
532 diameter ( $\mu\text{M}$ ) of wild-type and *Myc-335<sup>-/-</sup>* organoids after 7 days growth in the maximal dose  
533 of Wnt3 A conditioned media. Data for the box plots was from greater than 50 organoids from  
534 two independent experiments for each organoid type. ns – not significantly different. **D.**  
535 Fluorescence confocal microscopy of wild-type and *Myc-335<sup>-/-</sup>* organoids grown in the  
536 absence or presence of the maximal dose of Wnt3A conditioned media for 7 days. All sections  
537 were labelled with DAPI (blue), fluorescent phalloidin (*green*) and an antibody to ZFPL1 (red).  
538 Scale bars, 50  $\mu\text{m}$ . **E.** Model for *Apc* regulation of proliferation, tissue morphology and  
539 intracellular organisation in the small intestinal epithelia.

540

541

## 542 **Supplemental Figures**

543 **Supplementary Figure 1. Domain structure of *Apc* and mutant variants expressed in mouse**  
544 **models of intestinal epithelial tumorigenesis.** Labels for *Apc* protein-interaction domains are  
545 as in Fig. 1C.

546

547 **Supplementary Figure 2. No loss of microtubule organisation and intestinal epithelial**  
548 **morphology in *Apc*<sup>1638T/1638T</sup> mice.** Fluorescence confocal microscopy of sections of small  
549 intestinal epithelia from a wild-type (top panels) and *Apc*<sup>1638T/1638T</sup> (bottoms panels) mouse.  
550 *Left panels* are labelled with an antibody to ZFPL1 (green); *middle panels* are labelled with

551 fUEA (red); right panels are labelled with an antibody to Ki67 (red). All sections were co-  
552 labelled with DAPI. Scale bars, 100  $\mu$ m.

553

554 **Supplementary Figure 3. The pB-shApc switchable model of *in vitro* tumorigenesis/tumour  
555 regression recapitulates the phenotypic consequences of oncogenic Apc mutations. A.**

556 Transgenes used for the construction of the control pB-mCherry or pB-shApc organoid lines.

557 The shApc expression system includes pB-CAG-rtTA for constitutive rtTA expression and

558 expression of the *piggybac* transposase for stable integration into organoids. In-built *tet-on*

559 system enables inducible expression of shApc linked to mCherry by treatment of pB-shApc

560 organoids with doxycycline. **B.** Time-course of doxycycline treatment of pB-shApc organoids;

561 after ten days all organoids have converted to spheroids accompanied by mCherry

562 expression. Subsequent doxycycline withdrawal and growth for an additional 6 days leads to

563 restoration of organoid morphology. Scale bar, 200  $\mu$ m. **C.** Quantification of spheroid

564 conversion to organoids upon doxycycline withdrawal. Data is the average of greater than 100

565 organoids from two independent experiments were scored for each timepoint. **D.** Control or

566 pB-shApc organoids were treated with doxycycline as above and protein lysates were probed

567 with antibodies to c-Myc and the loading control vinculin. **E.** QRT-PCR quantification of Apc

568 and mCherry expression in control or pB-shApc organoids after two days doxycycline

569 treatment, 'ON', or 6-days post withdrawal, 'OFF'. Data is represented as mean of two

570 independent experiments. Error bars  $\pm$  SD

571

572 **Supplementary Figure 3. Genotyping of intestinal epithelia from *Myc-335*<sup>-/-</sup> mouse used in  
573 this study according to Sur et al.** PCR genotyping of *Myc-335*<sup>-/-</sup> intestinal epithelia using

574 primers targeting the wild-type (WT) or *Myc-335* mutant allele (mut). Primers and genotyping

575 conditions are described in Sur et al. (Sur et al., 2012).

576

577

578 **References**

- 579 **Aoki, R., Shoshkes-Carmel, M., Gao, N., Shin, S., May, C. L., Golson, M. L., Zahm, A. M.,**  
580 **Ray, M., Wisner, C. L., Wright, C. V. E., et al.** (2016). Foxl1-Expressing Mesenchymal  
581 Cells Constitute the Intestinal Stem Cell Niche. *Cmgh* **2**, 175–188.
- 582 **Crabtree, M., Sieber, O. M., Lipton, L., Hodgson, S. V., Lamlum, H., Thomas, H. J. W., Neale,**  
583 **K., Phillips, R. K. S., Heinimann, K. and Tomlinson, I. P. M.** (2003). Refining the relation  
584 between “first hits” and “second hits” at the APC locus: The “loose fit” model and  
585 evidence for differences in somatic mutation spectra among patients. *Oncogene* **22**,  
586 4257–4265.
- 587 **Dave, K., Sur, I., Yan, J., Zhang, J., Kaasinen, E., Zhong, F., Blaas, L., Li, X., Kharazi, S.,**  
588 **Gustafsson, C., et al.** (2017). Mice deficient of Myc super-enhancer region reveal  
589 differential control mechanism between normal and pathological growth. *Elife* **6**, 1–25.
- 590 **de Rodriguez, M. S. B., Sunter, J. P., Watson, A. J., Wright, N. A. and Appleton, D. R.** (1978).  
591 Cell population kinetics in the mucosal crypts of the descending colon of the mouse.  
592 *Virchows Arch. B Cell Pathol.* **29**, 351–361.
- 593 **Deka, J., Kuhlmann, J. and Müller, O.** (1998). A domain within the tumor suppressor protein  
594 APC shows very similar biochemical properties as the microtubule-associated protein  
595 tau. *Eur. J. Biochem.* **253**, 591–597.
- 596 **Dikovskaya, D., Schiffmann, D., Newton, I. P., Oakley, A., Kroboth, K., Sansom, O.,**  
597 **Jamieson, T. J., Meniel, V., Clarke, A. and Näthke, I. S.** (2007). Loss of APC induces  
598 polyploidy as a result of a combination of defects in mitosis and apoptosis. *J. Cell Biol.*  
599 **176**, 183–195.
- 600 **Dow, L. E., O’Rourke, K. P., Simon, J., Tschaharganeh, D. F., van Es, J. H., Clevers, H. and**  
601 **Lowe, S. W.** (2015). Apc Restoration Promotes Cellular Differentiation and  
602 Reestablishes Crypt Homeostasis in Colorectal Cancer. *Cell* **161**, 1539–1552.
- 603 **Farin, H. F., Van Es, J. H. and Clevers, H.** (2012). Redundant sources of Wnt regulate  
604 intestinal stem cells and promote formation of paneth cells. *Gastroenterology* **143**,  
605 1518-1529.e7.
- 606 **Fatehullah, A., Appleton, P. L. and Näthke, I. S.** (2013). Cell and tissue polarity in the  
607 intestinal tract during tumorigenesis: Cells still know the right way up, but tissue

- 608 organization is lost. *Philos. Trans. R. Soc. B Biol. Sci.* **368**,.
- 609 **Fodde, R., Kuipers, J., Rosenberg, C., Smits, R., Kielman, M., Gaspar, C., Van Es, J. H.,**  
610 **Breukel, C., Wiegant, J., Giles, R. H., et al.** (2001). Mutations in the APC tumour  
611 suppressor gene cause chromosomal instability. *Nat. Cell Biol.* **3**, 433–438.
- 612 **Fujii, M., Matano, M., Nanki, K. and Sato, T.** (2015). Efficient genetic engineering of human  
613 intestinal organoids using electroporation. *Nat. Protoc.* **10**, 1474–1485.
- 614 **Gehart, H. and Clevers, H.** (2019). Tales from the crypt: new insights into intestinal stem  
615 cells. *Nat. Rev. Gastroenterol. Hepatol.* **16**, 19–34.
- 616 **Goldspink, D. A., Matthews, Z. J., Lund, E. K., Wileman, T. and Mogensen, M. M.** (2017).  
617 Immuno-fluorescent Labeling of Microtubules and Centrosomal Proteins in *Ex*  
618 *Vivo* Intestinal Tissue and 3D *In Vitro* Intestinal Organoids. *J. Vis. Exp.*
- 619 **Green, R. A. and Kaplan, K. B.** (2003). Chromosome instability in colorectal tumor cells is  
620 associated with defects in microtubule plus-end attachments caused by a dominant  
621 mutation in APC. *J. Cell Biol.* **163**, 949–961.
- 622 **Gregorieff, A., Pinto, D., Begthel, H., Destrée, O., Kielman, M. and Clevers, H.** (2005).  
623 Expression Pattern of Wnt Signaling Components in the Adult Intestine.  
624 *Gastroenterology* **129**, 626–638.
- 625 **Groden, J., Thliveris, 't Wade Samowitz, A., Carlson, M., Gelbert, 't, L., Albertsen, H., Joslyn,**  
626 **G., Stevens, J., Spirio, L., Robertson, 't, M., Sargeant, L., et al.** (1991). Identification  
627 and Characterization of the Familial Adenomatous Polyposis Coli Gene. *Cell* **66**, 589–  
628 600.
- 629 **Haigis, K. M., Hoff, P. D., White, A., Shoemaker, A. R., Halberg, R. B. and Dove, W. F.**  
630 (2004). Tumor regionalism in the mouse intestine reflects the mechanism of loss of Apc  
631 function. *Proc. Natl. Acad. Sci.* **101**, 9769–9773.
- 632 **He, T., Sparks, A. B., Rago, C., Hermeking, H., Zawel, L., Costa, T., Morin, P. J., Vogelstein,**  
633 **B. and Kinzler, K. W.** (1998). Identification of c-MYC as a Target of the APC Pathway.  
634 *Science (80-. )*. **281**, 1509–1512.
- 635 **Kaplan, K. B., Burds, A. A., Swedlow, J. R., Bekir, S. S., Sorger, P. K. and Näthke, I. S.** (2001).  
636 A role for the Adenomatous Polyposis Coli protein in chromosome segregation. *Nat.*  
637 *Cell Biol.* **3**, 429–432.



- 638 **Karin Kroboth, Newton, I. P., Kita, K., Dikovskaya, D., Zumbrunn, J., Waterman-Storer, C.**  
639 **M. and Nathke, I. S.** (2007). Lack of Adenomatous Polyposis Coli Protein Correlates  
640 with a Decrease in Cell Migration and Overall Changes in Microtubule Stability. *Mol.*  
641 *Biol. Cell* **75**, 910–918.
- 642 **Kawasaki, Y., Senda, T., Koyama, R., Morishita, T., Iwayama, Y., Higuchi, O. and Akiyama,**  
643 **T.** (2000). Asef, a Link Between the Tumor Suppressor APC and G-Protein Signaling.  
644 *Science* (80-. ). **289**, 1194–1197.
- 645 **Kinzler, Kenneth W. and Vogelstein, B.** (1996). Lessons from Hereditary Colorectal Cancer.  
646 *Cell* **87**, 159–170.
- 647 **Lamlum, H., Ilyas, M., Rowan, A., Clark, S., Johnson, V., Bell, J., Frayling, I., Efstathiou, J.,**  
648 **Pack, K., Payne, S., et al.** (1999). The type of somatic mutation at APC in familial  
649 adenomatous polyposis is determined by the site of the germline mutation: A new  
650 facet to Knudson’s “two-hit” hypothesis. *Nat. Med.* **5**, 1071–1075.
- 651 **Langlands, A. J., Almet, A. A., Appleton, P. L., Newton, I. P., Osborne, J. M. and Näthke, I.**  
652 **S.** (2016). Paneth Cell-Rich Regions Separated by a Cluster of Lgr5+ Cells Initiate Crypt  
653 Fission in the Intestinal Stem Cell Niche. *PLoS Biol.* **14**, 1–31.
- 654 **Lee, B., Moon, K. M. and Kim, C. Y.** (2018). Tight junction in the intestinal epithelium: Its  
655 association with diseases and regulation by phytochemicals. *J. Immunol. Res.* **2018**,.
- 656 **Lewis, A., Davis, H., Deheragoda, M., Pollard, P., Nye, E., Jeffery, R., Segditsas, S., East, P.,**  
657 **Poulsom, R., Stamp, G., et al.** (2012). The C-terminus of Apc does not influence  
658 intestinal adenoma development or progression. *J. Pathol.* **226**, 73–83.
- 659 **Li, R. and Gundersen, G. G.** (2008). Beyond polymer polarity: How the cytoskeleton builds a  
660 polarized cell. *Nat. Rev. Mol. Cell Biol.* **9**, 860–873.
- 661 **Mogensen, M. M., Tucker, J. B., Mackie, J. B., Prescott, A. R. and Näthke, I. S.** (2002). The  
662 adenomatous polyposis coli protein unambiguously localizes to microtubule plus ends  
663 and is involved in establishing parallel arrays of microtubule bundles in highly polarized  
664 epithelial cells. *J. Cell Biol.* **157**, 1041–1048.
- 665 **Morrison, E. E., Wardleworth, B. N., Askham, J. M., Markham, A. F. and Meredith, D. M.**  
666 (1998). EB1, a protein which interacts with the APC tumour suppressor, is associated  
667 with the microtubule cytoskeleton throughout the cell cycle. *Oncogene* **17**, 3471–3477.

- 668 **Moseley, J. B., Bartolini, F., Okada, K., Wen, Y., Gundersen, G. G. and Goode, B. L.** (2007).  
669 Regulated binding of adenomatous polyposis coli protein to actin. *J. Biol. Chem.* **282**,  
670 12661–12668.
- 671 **Moser, A. R., Pitot, H. C. and Dove, W. F.** (1990). A dominant mutation that predisposes to  
672 multiple intestinal neoplasia in the mouse. *Science (80-. ).* **247**, 322–324.
- 673 **Moser, A. R., Luongo, C., Gould, K. A., McNeley, M. K., Shoemaker, A. R. and Dove, W. F.**  
674 (1995). ApcMin: A mouse model for intestinal and mammary tumorigenesis. *Eur. J.*  
675 *Cancer* **31**, 1061–1064.
- 676 **Munemitsu, S., Souza, B., Muller, O., Albert, I., Rubinfeld, B. and Polakis, P.** (1994). The  
677 APC Gene Product Associates with Microtubules in Vivo and Promotes Their Assembly  
678 in Vitro. *Cancer Res.* 3676–3681.
- 679 **Näthke** (1996). to Plasma Membrane Sites Involved in Active Cell Migration. *Cell* **134**, 165–  
680 179.
- 681 **Näthke, I. S.** (2004). THE ADENOMATOUS POLYPOSIS COLI PROTEIN: The Achilles Heel of the  
682 Gut Epithelium. *Annu. Rev. Cell Dev. Biol.* **20**, 337–366.
- 683 **Nelson, S. and Näthke, I. S.** (2013). Interactions and functions of the adenomatous polyposis  
684 coli (APC) protein at a glance. *J. Cell Sci.* **126**, 873–7.
- 685 **Oskarsson, T. and Trumpp, A.** (2005). The Myc trilogy: Lord of RNA polymerases. *Nat. Cell*  
686 *Biol.* **7**, 215–217.
- 687 **Pelaseyed, T. and Bretscher, A.** (2018). Regulation of actin-based apical structures on  
688 epithelial cells. *J. Cell Sci.* **131**, 1–10.
- 689 **Potten, C. S., Chwalinski, S., Swindell, R. and Palmer, M.** (1982). The spatial organization of  
690 the hierarchical proliferative cells of the crypts of the small intestine into clusters of  
691 “synchronized” cells. *Cell Tissue Kinet.* **15**, 351–370.
- 692 **Quinones, G. B., Danowski, B. A., Devaraj, A., Singh, V. and Ligon, L. A.** (2011). The  
693 posttranslational modification of tubulin undergoes a switch from detyrosination to  
694 acetylation as epithelial cells become polarized. *Mol. Biol. Cell* **22**, 1045–1057.
- 695 **Quyn, A. J., Appleton, P. L., Carey, F. A., Steele, R. J. C., Barker, N., Clevers, H., Ridgway, R.**  
696 **A., Sansom, O. J. and Näthke, I. S.** (2010). Spindle Orientation Bias in Gut Epithelial  
697 Stem Cell Compartments Is Lost in Precancerous Tissue. *Cell Stem Cell* **6**, 175–181.

- 698 **Rodriguez-Boulan, E. and Macara, I. G.** (2014). Organization and execution of the epithelial  
699 polarity programme. *Nat. Rev. Mol. Cell Biol.* **15**, 225–242.
- 700 **Rosin-Arbesfeld, R., Ihrke, G. and Bienz, M.** (2001). Actin-dependent membrane association  
701 of the APC tumour suppressor in polarized mammalian epithelial cells. *EMBO J.* **20**,  
702 5929–5939.
- 703 **Rowan, A. J., Lamlum, H., Ilyas, M., Wheeler, J., Straub, J., Papadopoulou, A., Bicknell, D.,**  
704 **Bodmer, W. F. and Tomlinson, I. P. M.** (2000). APC mutations in sporadic colorectal  
705 tumors: A mutational “hotspot” and interdependence of the “two hits.” *Proc. Natl.*  
706 *Acad. Sci. U. S. A.* **97**, 3352–3357.
- 707 **Sansom, O. J., Meniel, V., Wilkins, J. A., Cole, A. M., Oien, K. A., Marsh, V., Jamieson, T. J.,**  
708 **Guerra, C., Ashton, G. H., Barbacid, M., et al.** (2006). Loss of Apc allows phenotypic  
709 manifestation of the transforming properties of an endogenous K-ras oncogene in vivo.  
710 **103**,.
- 711 **Sansom, O. J., Meniel, V. S., Muncan, V., Phesse, T. J., Wilkins, J. A., Reed, K. R., Vass, J. K.,**  
712 **Athineos, D., Clevers, H. and Clarke, A. R.** (2007). Myc deletion rescues Apc deficiency  
713 in the small intestine. *Nature* **446**, 676–679.
- 714 **Sato, T. and Clevers, H.** (2013). Growing self-organizing mini-guts from a single intestinal  
715 stem cell: Mechanism and applications. *Science (80- )*. **340**, 1190–1194.
- 716 **Sato, T., Stange, D. E., Ferrante, M., Vries, R. G. J., Van Es, J. H., Van Den Brink, S., Van**  
717 **Houdt, W. J., Pronk, A., Van Gorp, J., Siersema, P. D., et al.** (2011). Long-term  
718 expansion of epithelial organoids from human colon, adenoma, adenocarcinoma, and  
719 Barrett’s epithelium. *Gastroenterology* **141**, 1762–1772.
- 720 **Smith, K. J., Levy, D. B., Maupin, P., Pollard, T. D. and Vogelstein, B.** (1994). Wild-Type but  
721 not Mutant APC Associates with the Microtubule Cytoskeleton<sup>1</sup>. *Cancer Res.* **54**, 3672–  
722 3675.
- 723 **Smits, R., Kielman, M. F., Breukel, C., Zurcher, C., Neufeld, K., Jagmohan-Changur, S.,**  
724 **Hofland, N., Van Dijk, J., White, R., Edelmann, W., et al.** (1999). Apc1638T: A mouse  
725 model delineating critical domains of the adenomatous polyposis coli protein involved  
726 in tumorigenesis and development. *Genes Dev.* **13**, 1309–1321.
- 727 **Stzepourginski, I., Nigro, G., Jacob, J. M., Dulauroy, S., Sansonetti, P. J., Eberl, G. and**

- 728 **Peduto, L.** (2017). CD34+ mesenchymal cells are a major component of the intestinal  
729 stem cells niche at homeostasis and after injury. *Proc. Natl. Acad. Sci. U. S. A.* **114**,  
730 E506–E513.
- 731 **Su, L. K., Kinzler, K. W., Vogelstein, B., Preisinger, A. C., Moser, A. R., Luongo, C., Gould, K.**  
732 **A. and Dove, W. F.** (1992). Multiple intestinal neoplasia caused by a mutation in the  
733 murine homolog of the APC gene. *Science (80- )*. **256**, 668–670.
- 734 **Sunter, J. P., Appleton, D. R., de Rodriguez, M. S. B., Wright, N. A. and Watson, A. J.** (1979).  
735 A comparison of cell proliferation at different sites within the large bowel of the  
736 mouse. *J. Anat.* **129**, 833–842.
- 737 **Sur, I. K., Hallikas, O., Vaharautio, A., Yan, J., Turunen, M., Enge, M., Taipale, M., Karhu, A.,**  
738 **Aaltonen, L. A. and Taipale, J.** (2012). Mice Lacking a Myc Enhancer That Includes  
739 Human SNP rs6983267 Are Resistant to Intestinal Tumors. *Science (80- )*. **338**, 1360–  
740 1363.
- 741 **Tighe, A., Johnson, V. L. and Taylor, S. S.** (2004). Truncating APC mutations have dominant  
742 effects on proliferation, spindle checkpoint control, survival and chromosome stability.  
743 *J. Cell Sci.* **117**, 6339–6353.
- 744 **Tirnauer, J. S.** (2004). A new cytoskeletal connection for APC: Linked to actin through  
745 IQGAP. *Dev. Cell* **7**, 778–780.
- 746 **Urbischek, M., Rannikmae, H., Foets, T., Ravn, K., Hyvönen, M. and de la Roche, M.** (2019).  
747 Organoid culture media formulated with growth factors of defined cellular activity. *Sci.*  
748 *Rep.* **9**, 1–11.
- 749 **Valenta, T., Degirmenci, B., Moor, A. E., Herr, P., Zimmerli, D., Moor, M. B., Hausmann, G.,**  
750 **Cantù, C., Aguet, M. and Basler, K.** (2016). Wnt Ligands Secreted by Subepithelial  
751 Mesenchymal Cells Are Essential for the Survival of Intestinal Stem Cells and Gut  
752 Homeostasis. *Cell Rep.* **15**, 911–918.
- 753 **Vasquez, R. J., Howell, B., Yvon, A. M., Wadsworth, P. and Cassimeris, L.** (1997).  
754 Nanomolar concentrations of nocodazole alter microtubule dynamic instability in vivo  
755 and in vitro. *Mol. Biol. Cell* **8**, 973–985.
- 756 **Volgstein, B. and Fearon, E.** (1990). A Genetic Model for Colorectal tumorigenesis. *Cell* **61**,  
757 759–767.

- 758 **Willert, K., Brown, J. D., Danenberg, E., Duncan, A. W., Weissman, I. L., Reya, T., Yates, J.**  
759 **R. and Nusse, R.** (2003). Wnt proteins are lipid-modified and can act as stem cell  
760 growth factors. *Nature* **423**, 448–452.
- 761 **Yan, K. S., Janda, C. Y., Chang, J., Zheng, G. X. Y., Larkin, K. A., Luca, V. C., Chia, L. A., Mah,**  
762 **A. T., Han, A., Terry, J. M., et al.** (2017). Non-equivalence of Wnt and R-spondin ligands  
763 during Lgr5 + intestinal stem-cell self-renewal. *Nature* **545**, 238–242.
- 764 **Zou, W. Y., Blutt, S. E., Zeng, X. L., Chen, M. S., Lo, Y. H., Castillo-Azofeifa, D., Klein, O. D.,**  
765 **Shroyer, N. F., Donowitz, M. and Estes, M. K.** (2018). Epithelial WNT Ligands Are  
766 Essential Drivers of Intestinal Stem Cell Activation. *Cell Rep.* **22**, 1003–1015.
- 767 **Zumbrunn, J., Kinoshita, K., Hyman†, A. A. and Nathke, I. S.** (2001). Binding of the  
768 adenomatous polyposis coli protein to microtubules increases microtubule stability and  
769 is regulated by GSK3 $\beta$  phosphorylation. *Curr. Biol.* **11**, 44–49.
- 770

Figure 1.

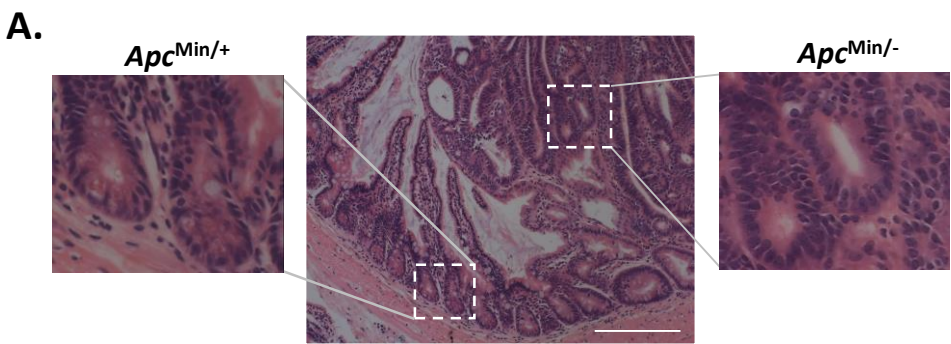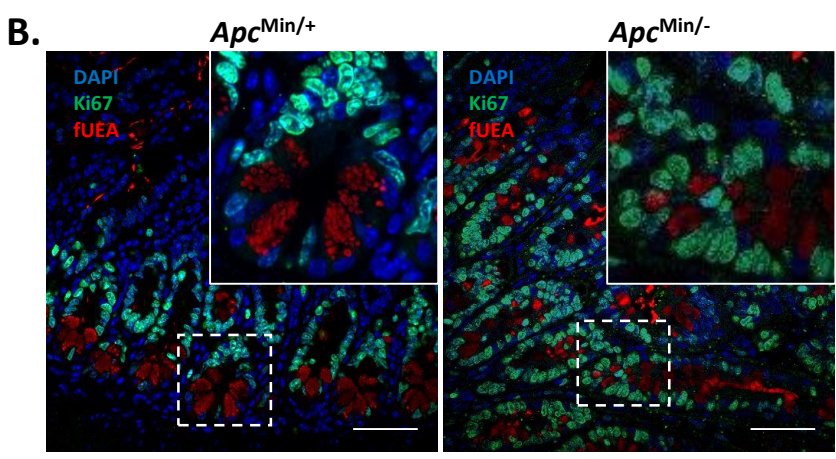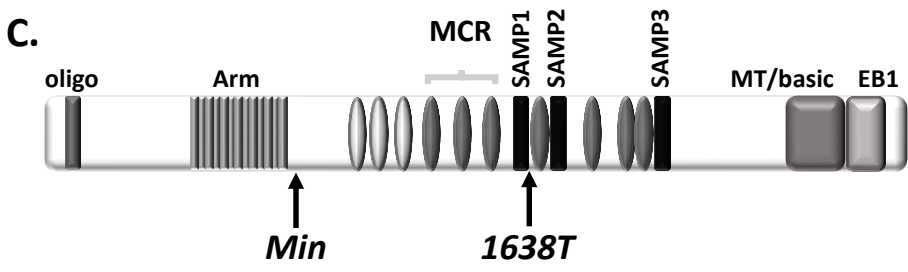

Figure 2.

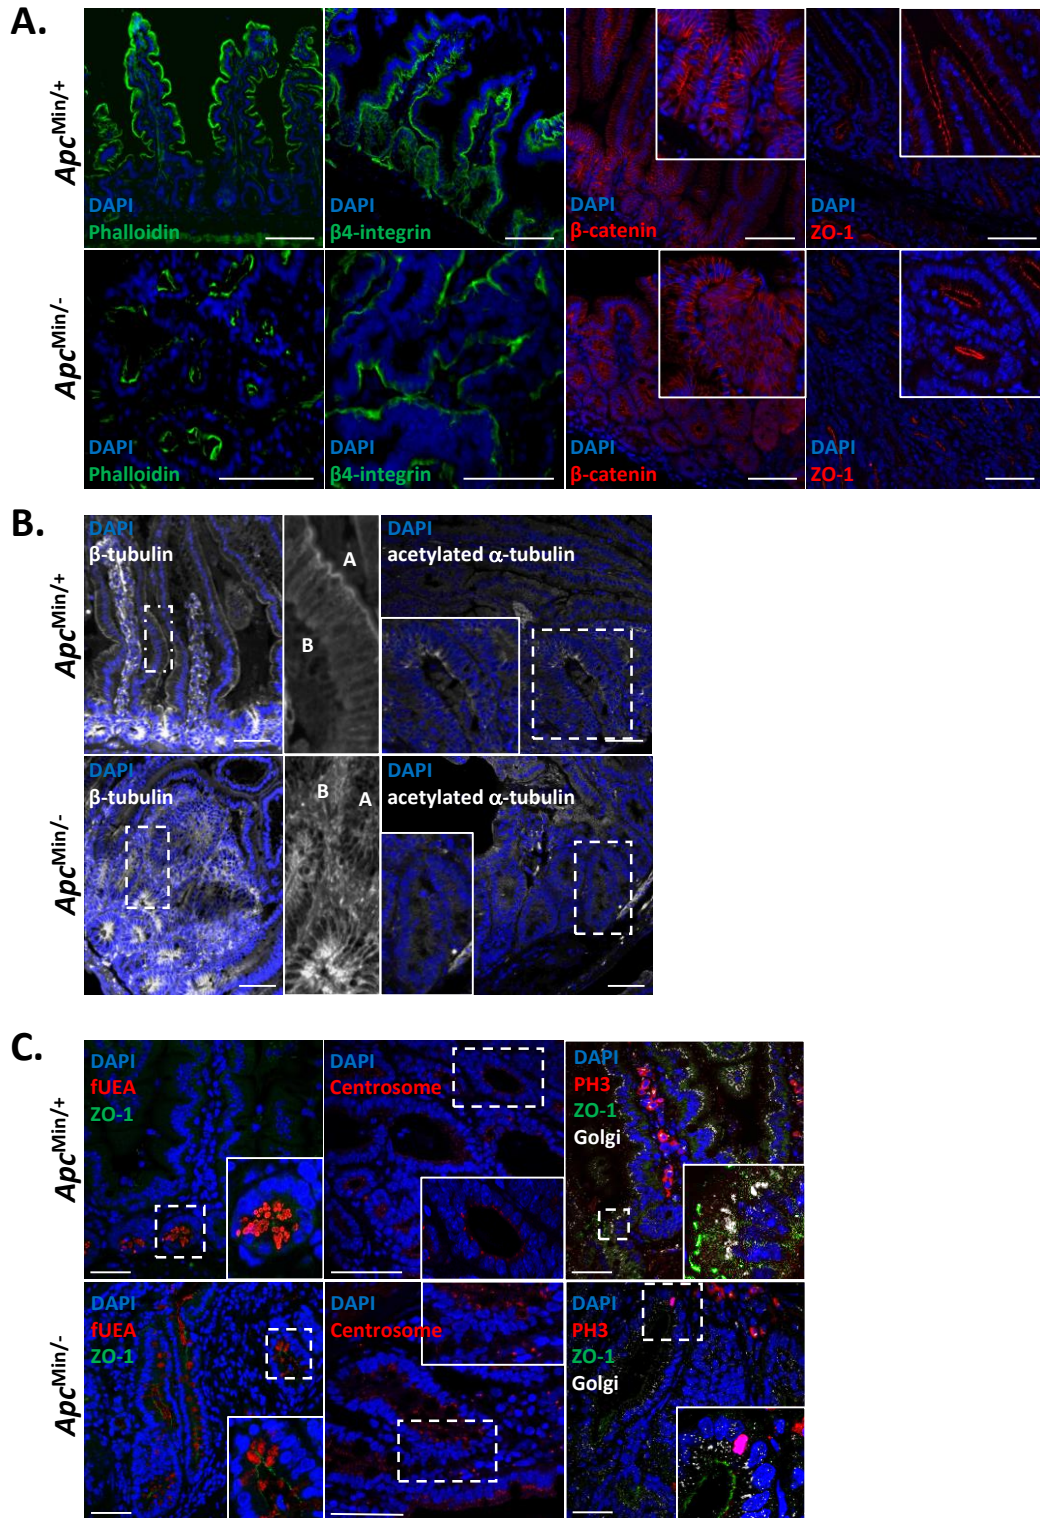

**Figure 3.**

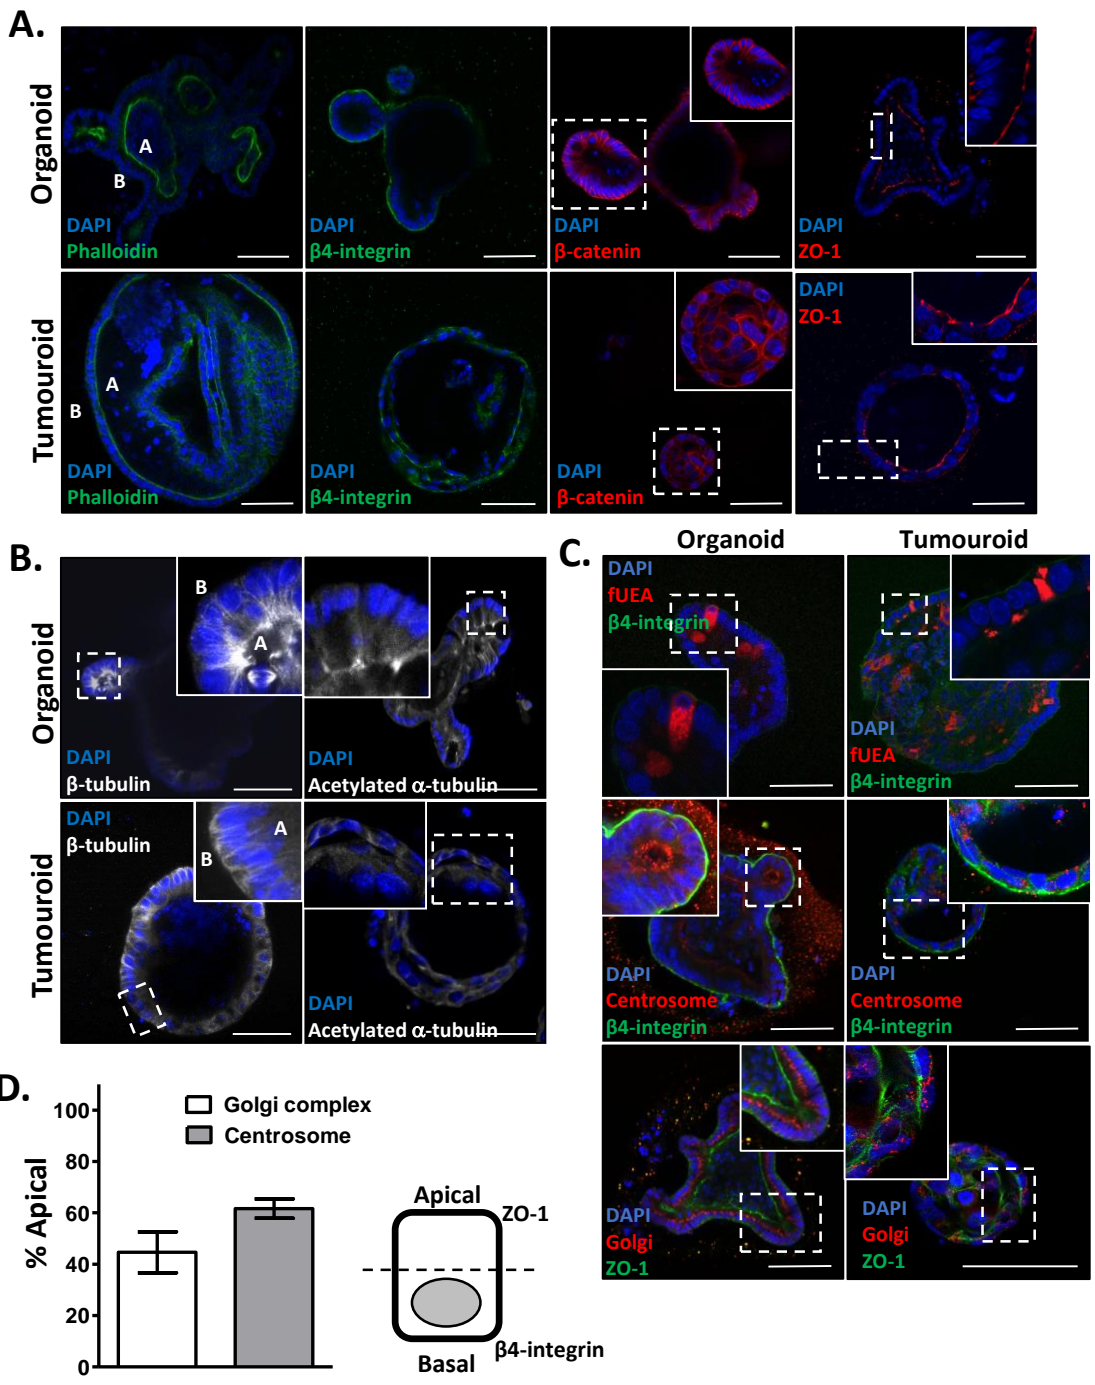



**Figure 4.**

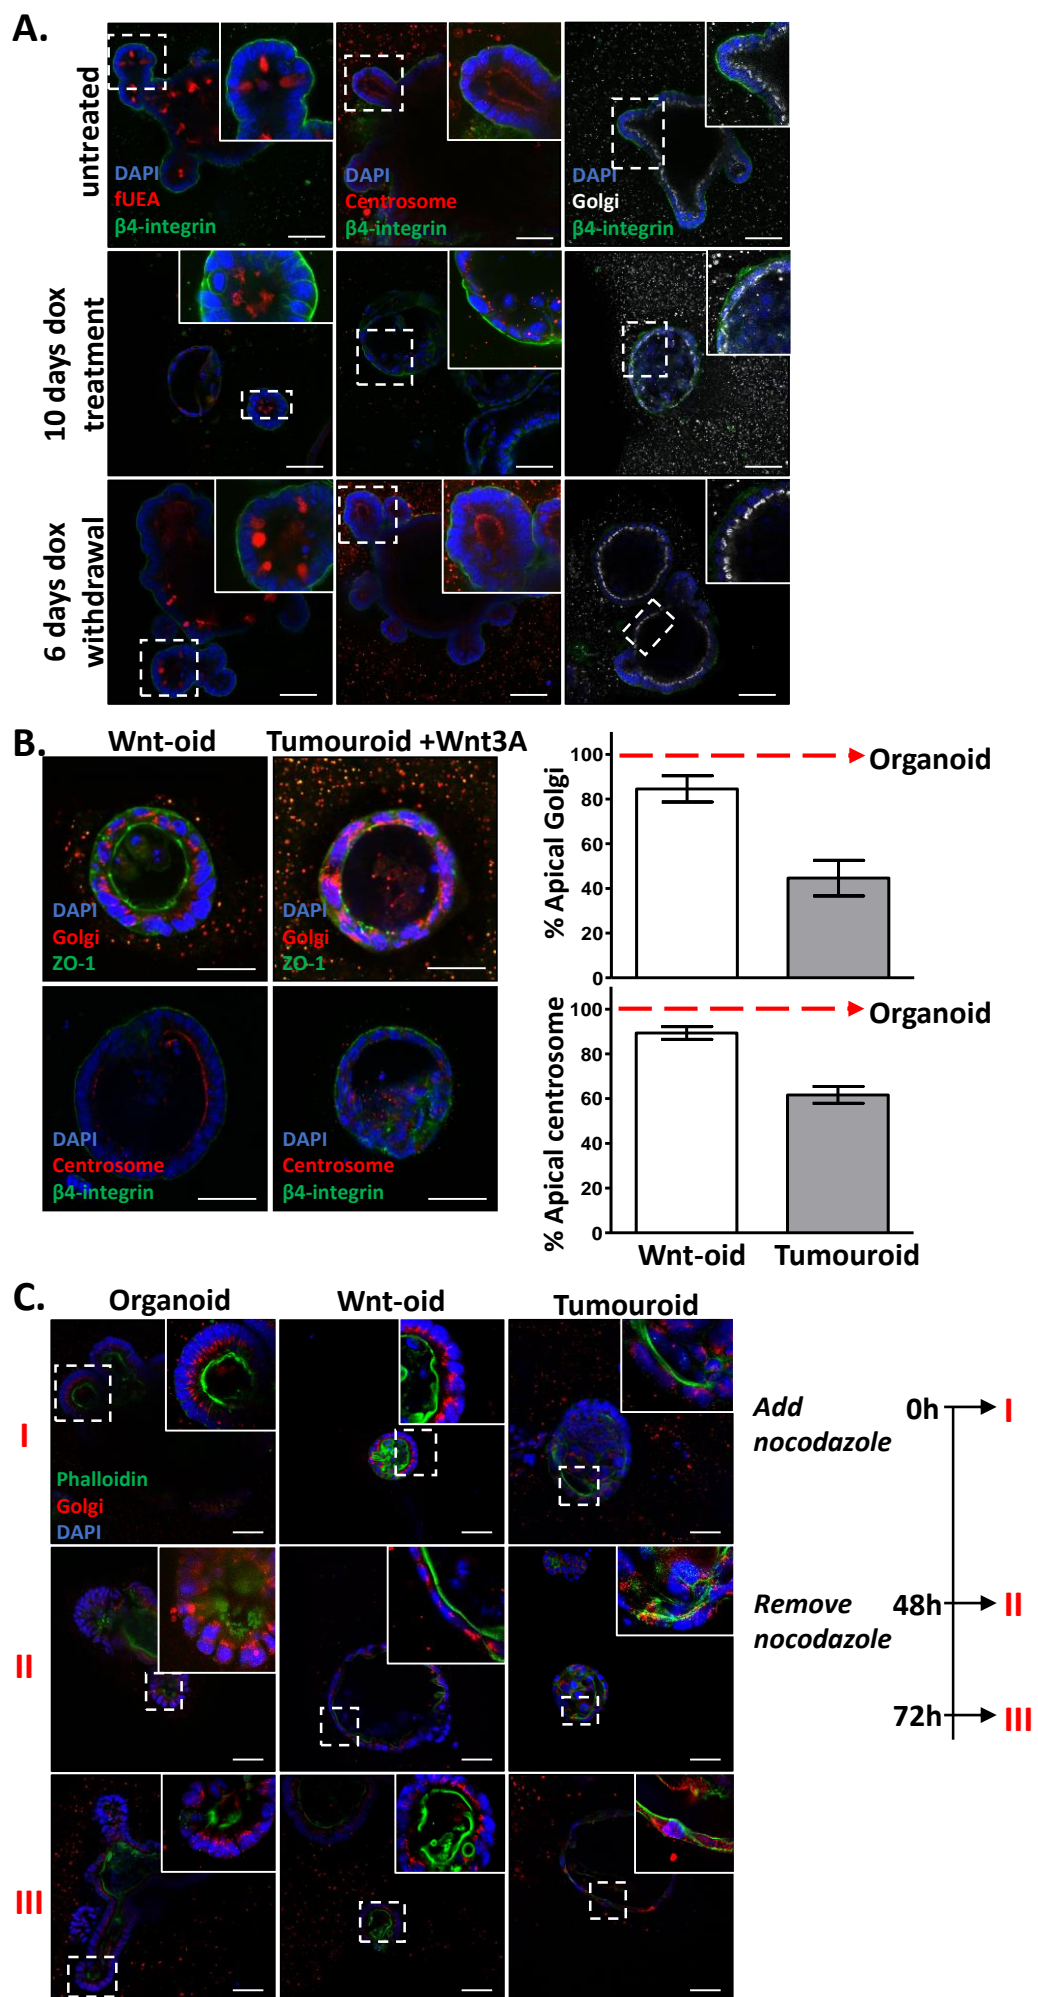

**Figure 5.**

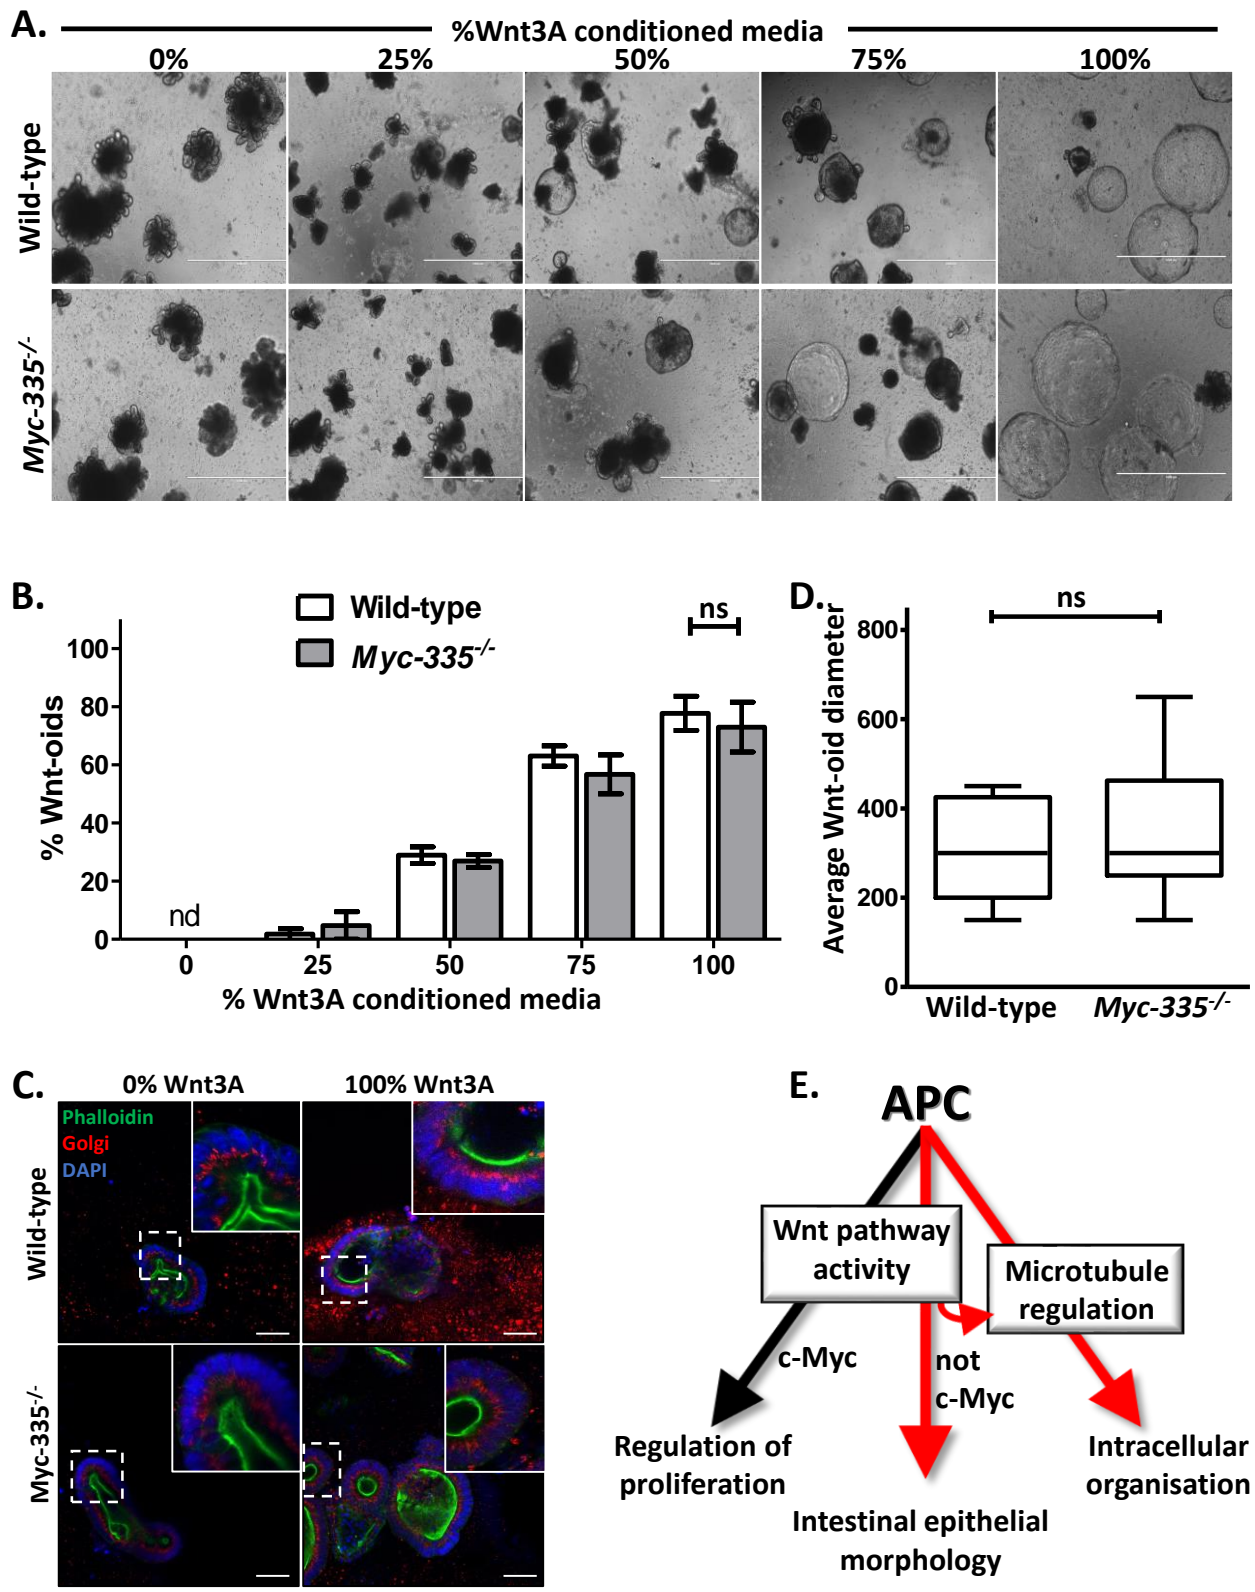

# Supplemental Figure 1.

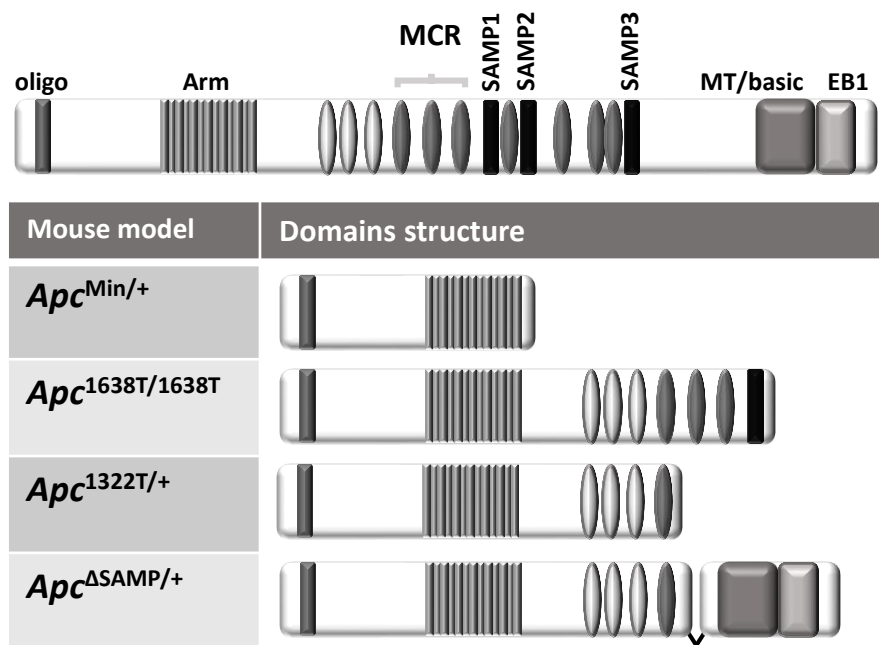

# Supplemental Figure 2.

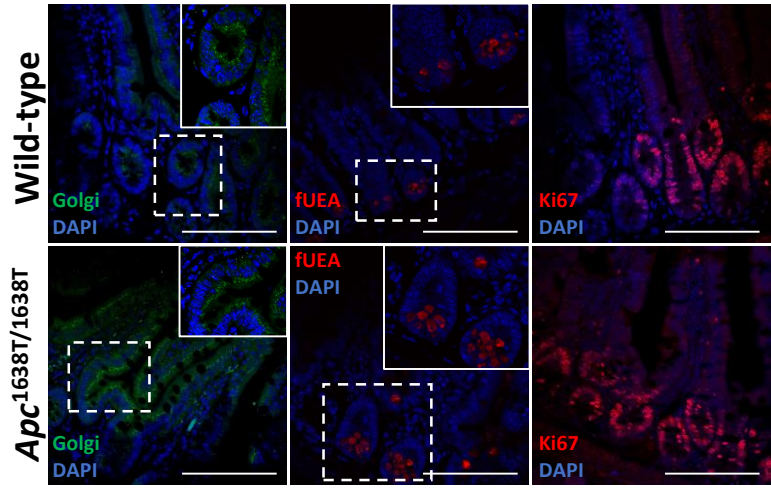

# Supplemental Figure 3.

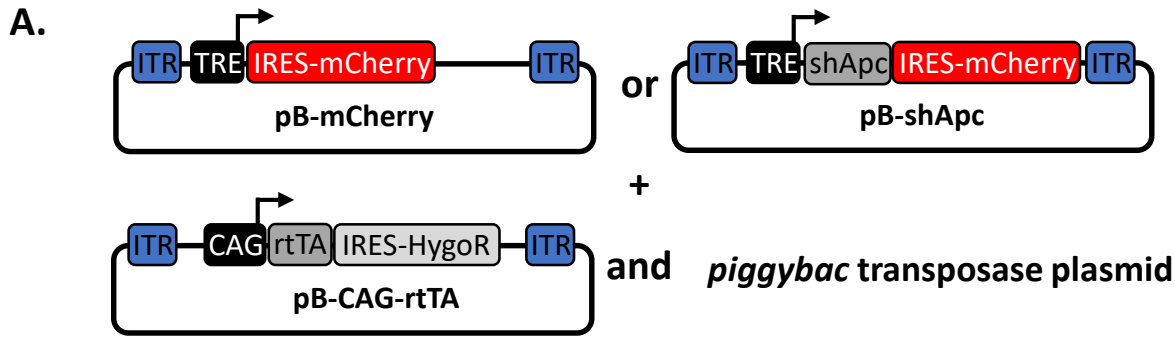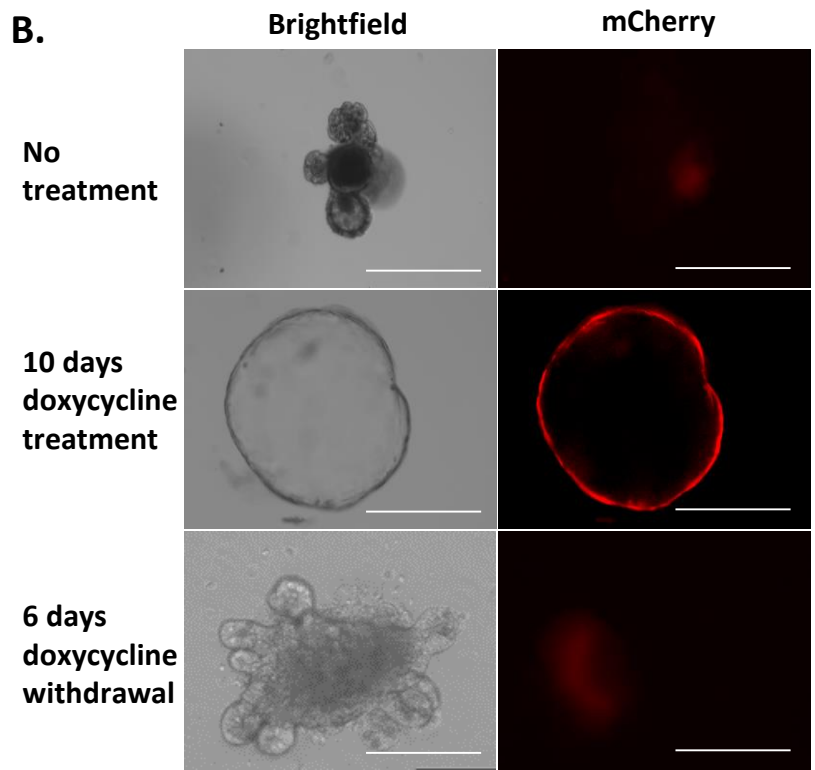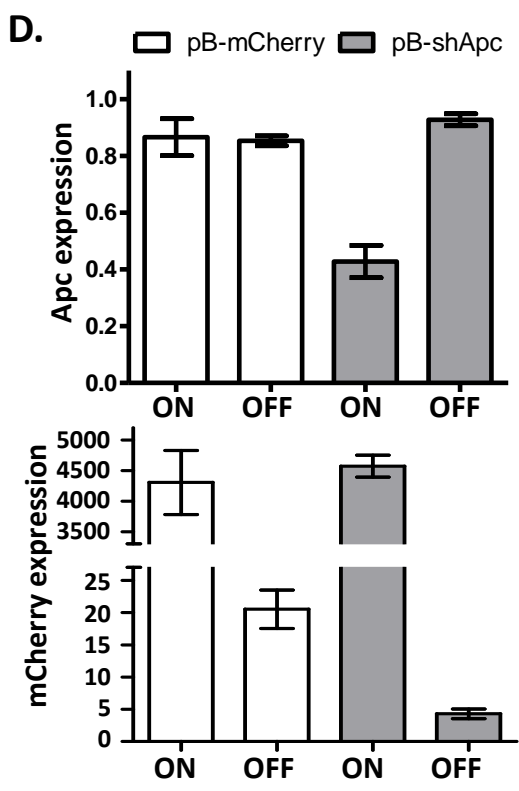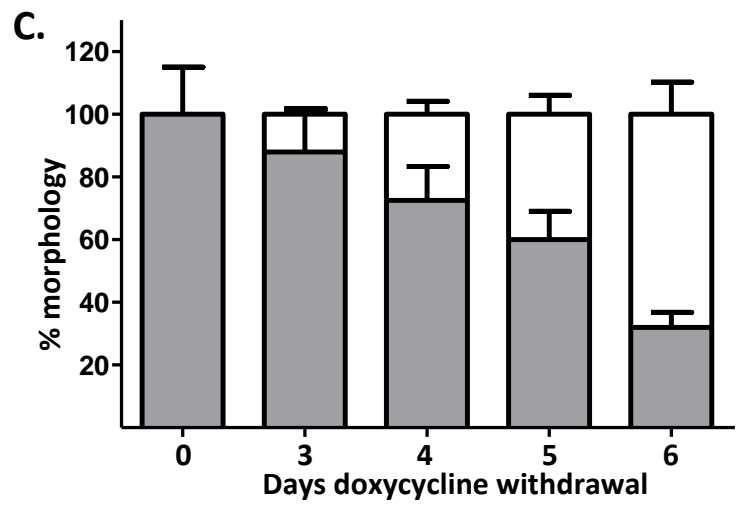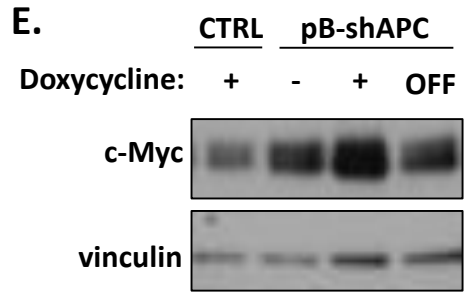

# Supplemental Figure 4.

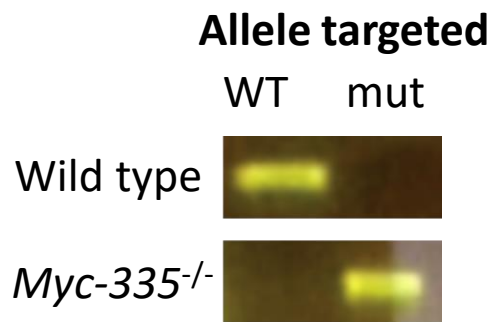

Source: https://www.biorxiv.org/content/10.1101/2020.06.10.143800v1.full.pdf
